# Supplementary material for: A Long Non-coding RNA Signature to Improve Prognostic Prediction of Pancreatic Ductal Adenocarcinoma
Source: PubMed Central journal article supplement (PMC6857660; doi:10.3389/fonc.2019.01160), 2019-11-08
Supplement: Data_Sheet_1.pdf [file Data_Sheet_1.pdf]

## Supplementary Material

### Supplementary Figures

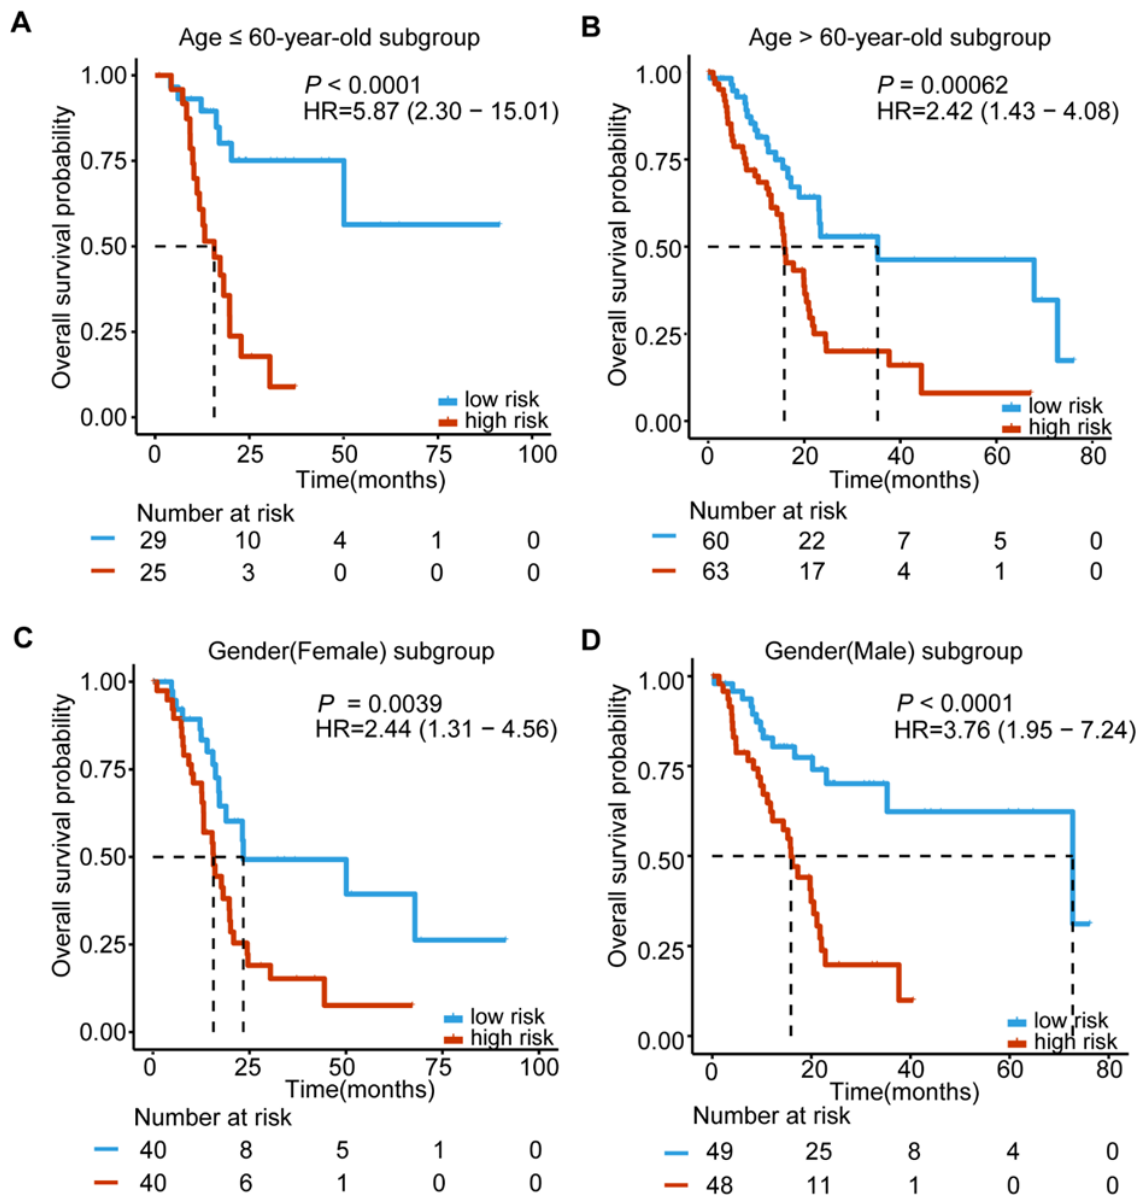

**Figure S1.** Kaplan–Meier survival analysis to assess the independence of the 5-lncRNA signature from age and gender. The patients from the entire TCGA were stratified into subgroups. The 5-lncRNA signature was applied to  $\leq 60$ -year-old patients (A),  $> 60$ -year-old patients (B), female patients (C), and male patients (D), separately. The number of patients at risk is listed below the survival curves. The tick marks on the Kaplan–Meier curves represents the censored subjects. Two-sided log-rank test was adopted to determine the differences between the two curves.

## Supplementary Tables

**Table S1.** Primers of five lncRNAs and internal control for qRT-PCR.

| Primers       |         | 5'→3'                  |
|---------------|---------|------------------------|
| RP11-159F24.5 | Forward | CCAGCCGAGAACTAACCACA   |
|               | Reverse | TGGCACCCATACACTTGCTC   |
| RP11-744N12.2 | Forward | CTCTGGACCGTCCTCCCTAC   |
|               | Reverse | ACCTGTTTTGGATGTCCGGG   |
| RP11-388M20.1 | Forward | CACCCATGTTAGCGGCAAGA   |
|               | Reverse | ACTTTGTCGTTGGCTCCAGA   |
| RP11-356C4.5  | Forward | ACCGACCGGAGACCATTG     |
|               | Reverse | TCAGCTGCACTGTCCAGAAAT  |
| CTC-459F4.9   | Forward | TCATGAGCAGAAGCCTCACG   |
|               | Reverse | AGGTGTTTGAACAACCTGA    |
| ACTB          | Forward | GGACCTGACTGACTACCTCAT  |
|               | Reverse | CGTAGCACAGCTTCTCCTTAAT |

**Table S2.** Top 1000 significantly up-regulated DEGs in high versus low-risk PDAC patients in TCGA dataset

| <b>Gene symbol</b> | <b>logFC</b> | <b>AveExpr</b> | <b>t</b> | <b>Fold Change (FC)</b> |
|--------------------|--------------|----------------|----------|-------------------------|
| PNLIP              | 2.045237     | 8.453061       | 2.17314  | 4.12741                 |
| TRY6               | 1.936282     | 7.877335       | 2.924158 | 3.82718                 |
| PRSS1              | 1.932067     | 9.50307        | 2.584373 | 3.816017                |
| KLK1               | 1.836875     | 4.869373       | 3.719546 | 3.572355                |
| PRSS3              | 1.831064     | 7.309151       | 4.558847 | 3.557995                |
| CLPS               | 1.800149     | 7.168339       | 2.144448 | 3.482562                |
| GP2                | 1.747505     | 7.158523       | 2.259119 | 3.357774                |
| CELA2A             | 1.712074     | 6.783706       | 1.929192 | 3.276315                |
| CPA1               | 1.705388     | 8.563021       | 1.90517  | 3.261167                |
| CLDN18             | 1.675434     | 8.244075       | 2.829766 | 3.194155                |
| CELA3B             | 1.651266     | 7.094141       | 1.927081 | 3.141091                |
| CELA3A             | 1.639917     | 8.746538       | 1.802875 | 3.11648                 |
| REG4               | 1.572373     | 8.039968       | 2.624788 | 2.973934                |
| CEACAM5            | 1.544647     | 7.380381       | 2.832229 | 2.917327                |
| CELP               | 1.543434     | 3.674671       | 2.066348 | 2.914874                |
| CTRB2              | 1.510808     | 9.171878       | 1.63593  | 2.849696                |
| PLA2G1B            | 1.468344     | 5.978326       | 1.887268 | 2.767041                |
| CPB1               | 1.462721     | 7.696889       | 1.701681 | 2.756277                |
| IL22RA1            | 1.452328     | 3.720659       | 5.757311 | 2.736494                |
| S100P              | 1.441578     | 5.436965       | 3.282831 | 2.716179                |
| CELA2B             | 1.426758     | 5.360154       | 1.839683 | 2.688419                |
| AMY2A              | 1.417243     | 6.080361       | 1.702134 | 2.670747                |
| TNNT1              | 1.409591     | 0.431291       | 3.405826 | 2.656619                |
| CTRB1              | 1.395167     | 8.510534       | 1.543311 | 2.63019                 |
| MUC17              | 1.387793     | 7.150697       | 2.378906 | 2.616781                |
| SYCN               | 1.379225     | 5.298962       | 1.859538 | 2.601285                |
| REG3A              | 1.361771     | 8.532898       | 1.708451 | 2.570006                |
| CPA2               | 1.356443     | 6.727316       | 1.614509 | 2.560531                |
| CTRC               | 1.356094     | 7.267493       | 1.615037 | 2.559912                |
| KLK7               | 1.345123     | 4.540572       | 2.79319  | 2.540518                |
| FER1L6             | 1.338335     | 4.602734       | 2.779934 | 2.528593                |
| KLK8               | 1.338004     | 3.185317       | 2.807883 | 2.528013                |
| CLCA1              | 1.331749     | 2.611451       | 2.387968 | 2.517076                |
| COL17A1            | 1.31386      | 4.283096       | 3.049201 | 2.486059                |
| SERPINB5           | 1.293013     | 4.339273       | 3.599424 | 2.450393                |
| B3GNT6             | 1.277622     | 3.791894       | 2.782279 | 2.42439                 |
| ANXA10             | 1.268813     | 8.148976       | 2.927272 | 2.409632                |
| PSAPL1             | 1.26565      | 3.235157       | 2.883912 | 2.404356                |
| REG1A              | 1.265105     | 9.807173       | 1.776378 | 2.403446                |
| TM4SF20            | 1.258912     | 3.466394       | 2.522031 | 2.393152                |
| CA12               | 1.255527     | -0.25065       | 4.597573 | 2.387544                |
| EREG               | 1.226257     | 2.792088       | 3.371004 | 2.339593                |
| KRT20              | 1.20095      | 2.633724       | 2.143313 | 2.29891                 |

## Supplementary Material

|          |          |          |          |          |
|----------|----------|----------|----------|----------|
| PNLIPRP2 | 1.188325 | 5.814802 | 1.5164   | 2.278881 |
| RASEF    | 1.187435 | 1.79485  | 4.01505  | 2.277475 |
| ZG16     | 1.179663 | 0.956104 | 3.527917 | 2.265239 |
| RNF186   | 1.170385 | 3.244428 | 4.222422 | 2.250718 |
| DHRS9    | 1.168287 | 3.243168 | 2.946626 | 2.247446 |
| PNLIPRP1 | 1.163862 | 5.978338 | 1.484242 | 2.240564 |
| REG1B    | 1.157885 | 7.161506 | 1.400606 | 2.231301 |
| DSG3     | 1.155498 | 2.196709 | 2.539544 | 2.227612 |
| GABRP    | 1.154746 | 5.274919 | 2.554025 | 2.226451 |
| FAM83A   | 1.151405 | 3.29532  | 2.67913  | 2.221302 |
| SLC6A14  | 1.132297 | 5.08291  | 2.85339  | 2.192075 |
| C12orf36 | 1.122629 | 5.128698 | 2.892948 | 2.177434 |
| KBTBD12  | 1.120947 | 2.995614 | 3.296496 | 2.174897 |
| SERPINI2 | 1.112764 | 3.386536 | 1.835151 | 2.162596 |
| SDR16C5  | 1.108183 | 4.381438 | 3.329082 | 2.15574  |
| HMGA2    | 1.102451 | 1.877789 | 3.357439 | 2.147191 |
| CEL      | 1.088219 | 4.669586 | 1.448419 | 2.126115 |
| KLK11    | 1.085085 | 4.590395 | 3.006377 | 2.1215   |
| TMEM52   | 1.078618 | 0.708351 | 3.704898 | 2.112012 |
| CTSE     | 1.07263  | 8.917552 | 2.378092 | 2.103264 |
| NIPAL1   | 1.069147 | 0.829704 | 5.379772 | 2.098193 |
| CUZD1    | 1.067097 | 3.754478 | 2.074998 | 2.095214 |
| AQP8     | 1.063333 | 3.078192 | 1.798379 | 2.089754 |
| DPCR1    | 1.050901 | 8.331693 | 1.75928  | 2.071824 |
| CEACAM6  | 1.049887 | 7.632522 | 2.520969 | 2.070367 |
| LIPH     | 1.046411 | 3.802355 | 4.364037 | 2.065386 |
| UGT1A1   | 1.041587 | 2.252977 | 2.701012 | 2.058491 |
| OVOL1    | 1.03308  | 1.258374 | 3.640215 | 2.046389 |
| MT1H     | 1.03163  | 1.290242 | 3.256935 | 2.044332 |
| GALNT5   | 1.024633 | 3.823432 | 3.302446 | 2.034441 |
| GPRC5A   | 1.019827 | 3.377046 | 2.946854 | 2.027676 |
| TMPRSS4  | 1.015572 | 5.586462 | 2.602024 | 2.021704 |
| C6orf127 | 1.013906 | 0.944088 | 3.050764 | 2.019371 |
| SPINK1   | 1.013341 | 8.9673   | 2.667077 | 2.01858  |
| MYBPC1   | 1.001539 | 0.511259 | 1.998928 | 2.002135 |
| DKK1     | 0.99502  | 3.023303 | 2.60283  | 1.993109 |
| ITLN1    | 0.992204 | 2.043106 | 1.883063 | 1.989221 |
| GSTA2    | 0.987485 | 2.212679 | 2.383432 | 1.982725 |
| SERPINB3 | 0.986562 | 2.56507  | 1.995614 | 1.981458 |
| PTF1A    | 0.983989 | 2.018834 | 2.395128 | 1.977927 |
| PLA2G10  | 0.982515 | 4.708538 | 3.095579 | 1.975907 |
| NTSR1    | 0.978507 | 3.379295 | 2.426189 | 1.970425 |
| VSIG1    | 0.975145 | 4.864617 | 2.210536 | 1.965839 |
| UGT1A10  | 0.968658 | 6.646577 | 2.130871 | 1.95702  |
| C6orf222 | 0.967486 | 5.913323 | 2.948966 | 1.95543  |
| POF1B    | 0.96675  | 4.090089 | 3.742872 | 1.954434 |

|          |          |          |          |          |
|----------|----------|----------|----------|----------|
| REG3G    | 0.960502 | 5.520569 | 1.296624 | 1.945987 |
| TCN1     | 0.959011 | 7.266813 | 2.309854 | 1.943977 |
| MYEOV    | 0.950976 | 4.806619 | 2.614094 | 1.93318  |
| RAB27B   | 0.950622 | 1.618789 | 4.742788 | 1.932706 |
| LOC84740 | 0.949802 | 4.530855 | 2.362915 | 1.931607 |
| GKN2     | 0.94896  | 0.864808 | 2.821109 | 1.93048  |
| PTPRR    | 0.945743 | 2.872663 | 4.235012 | 1.926181 |
| TMPRSS2  | 0.944387 | 3.328939 | 4.219548 | 1.924371 |
| TFF2     | 0.943765 | 8.588441 | 1.909446 | 1.923541 |
| GJB4     | 0.942718 | 4.102233 | 2.852665 | 1.922146 |
| PLA2G2F  | 0.941451 | 1.397294 | 2.680619 | 1.920459 |
| REG1P    | 0.939568 | 3.724706 | 1.589798 | 1.917954 |
| PDIA2    | 0.939336 | 4.076639 | 1.795237 | 1.917646 |
| LGALS9B  | 0.938744 | 1.540188 | 2.978236 | 1.916859 |
| FAM160A1 | 0.9368   | 0.322419 | 6.534918 | 1.914278 |
| GRHL2    | 0.926936 | 1.798755 | 3.585336 | 1.901234 |
| BCL2L14  | 0.92171  | 3.159743 | 3.48345  | 1.89436  |
| INHBA    | 0.914457 | 2.583742 | 3.3976   | 1.884859 |
| MFSD4    | 0.914169 | 1.809884 | 4.58528  | 1.884483 |
| TMC5     | 0.913916 | 5.071053 | 3.210688 | 1.884152 |
| GUCA1C   | 0.912901 | 1.215964 | 2.747557 | 1.882828 |
| CST1     | 0.909541 | 5.39497  | 2.190184 | 1.878448 |
| ATP10B   | 0.905309 | 4.294987 | 2.614667 | 1.872946 |
| MUC4     | 0.904553 | 3.960972 | 2.179851 | 1.871964 |
| MT1G     | 0.899999 | 1.405627 | 2.838821 | 1.866065 |
| TFF1     | 0.89616  | 7.966299 | 1.766033 | 1.861105 |
| POU2F3   | 0.889619 | 2.190491 | 3.042959 | 1.852687 |
| AQP5     | 0.889275 | 4.962929 | 2.136345 | 1.852246 |
| HOXA13   | 0.888346 | 0.964563 | 2.190174 | 1.851052 |
| PIGR     | 0.888136 | 4.95877  | 2.092307 | 1.850783 |
| RPL3L    | 0.887931 | 0.245597 | 3.197851 | 1.85052  |
| PROM1    | 0.88725  | 3.923407 | 2.715317 | 1.849647 |
| ITGB6    | 0.885785 | 4.245603 | 2.50132  | 1.847769 |
| SFN      | 0.881216 | 2.159017 | 2.553622 | 1.841927 |
| SULT1B1  | 0.880216 | 3.483334 | 2.621595 | 1.840651 |
| GPHA2    | 0.878487 | 1.465142 | 2.204613 | 1.838446 |
| CA9      | 0.876063 | 3.926881 | 2.181182 | 1.83536  |
| CCK      | 0.872326 | 2.531196 | 2.276491 | 1.830613 |
| GREM1    | 0.872313 | 4.284427 | 2.683446 | 1.830595 |
| TRIM29   | 0.864428 | 3.28395  | 2.033675 | 1.820618 |
| SLC7A11  | 0.862562 | 0.882459 | 4.29852  | 1.818265 |
| KLK10    | 0.859477 | 4.604143 | 2.087932 | 1.814381 |
| PRSS8    | 0.85628  | 2.29208  | 2.703458 | 1.810364 |
| RBPJL    | 0.856249 | 3.253398 | 1.501925 | 1.810325 |
| GJB5     | 0.85553  | 1.851036 | 2.343432 | 1.809424 |
| C4orf31  | 0.854169 | 2.006111 | 3.382072 | 1.807717 |

## Supplementary Material

|            |          |          |          |          |
|------------|----------|----------|----------|----------|
| FERMT1     | 0.853051 | 2.840035 | 3.650136 | 1.806317 |
| SYTL5      | 0.849604 | 2.021682 | 2.903647 | 1.802006 |
| CAPN9      | 0.844943 | 3.748889 | 2.008684 | 1.796194 |
| PGC        | 0.844704 | 5.560279 | 1.255339 | 1.795896 |
| CXADR      | 0.841587 | 0.306294 | 4.970806 | 1.79202  |
| TNS4       | 0.837799 | 3.29951  | 1.971267 | 1.787321 |
| IL8        | 0.836707 | 2.026944 | 2.976542 | 1.785969 |
| PRSS21     | 0.836214 | 2.213042 | 2.093533 | 1.785359 |
| CDKL5      | 0.836006 | 0.334445 | 3.607123 | 1.785102 |
| PLS1       | 0.835158 | 2.662009 | 4.997824 | 1.784053 |
| GJB6       | 0.834507 | 0.342266 | 2.39603  | 1.783247 |
| GKN1       | 0.834312 | 1.433918 | 2.163139 | 1.783007 |
| AQP12B     | 0.831016 | 3.242953 | 1.884399 | 1.778938 |
| XK         | 0.830579 | 1.151301 | 4.315545 | 1.778399 |
| ST6GALNAC1 | 0.829691 | 4.07503  | 2.559686 | 1.777305 |
| PSCA       | 0.827775 | 5.297038 | 1.536011 | 1.774946 |
| LOC284578  | 0.827017 | 1.109339 | 3.671941 | 1.774014 |
| LGALS4     | 0.825858 | 8.279622 | 2.103017 | 1.772589 |
| KCTD14     | 0.824236 | 1.20242  | 4.173201 | 1.770597 |
| FUT3       | 0.819629 | 4.754432 | 2.723474 | 1.764952 |
| MET        | 0.817474 | 1.352748 | 4.385717 | 1.762317 |
| TSPAN8     | 0.814402 | 6.983448 | 2.6331   | 1.758569 |
| UCA1       | 0.813314 | 4.066285 | 2.117989 | 1.757243 |
| FA2H       | 0.811204 | 3.798353 | 3.741077 | 1.754675 |
| BCAS1      | 0.807348 | 3.948085 | 2.491267 | 1.749992 |
| TRPA1      | 0.805426 | 0.596266 | 3.114298 | 1.747662 |
| SLC6A20    | 0.802443 | 5.195894 | 2.748006 | 1.744052 |
| ZNF488     | 0.80203  | 1.661028 | 3.34535  | 1.743552 |
| GGT6       | 0.801249 | 2.756491 | 2.513291 | 1.74261  |
| PLEK2      | 0.801035 | 2.420527 | 3.059009 | 1.74235  |
| FMN1       | 0.798599 | 1.594724 | 4.171465 | 1.739411 |
| AQP12A     | 0.798564 | 1.285981 | 2.43861  | 1.739369 |
| SCNN1A     | 0.793061 | 2.678335 | 2.990431 | 1.732747 |
| AKR7A3     | 0.791122 | 3.292027 | 3.012125 | 1.730419 |
| CYP2S1     | 0.790862 | 2.931377 | 2.566307 | 1.730108 |
| EHF        | 0.790309 | 2.889067 | 3.732564 | 1.729444 |
| AGR2       | 0.787031 | 5.640002 | 2.383154 | 1.72552  |
| GATM       | 0.786502 | 1.89692  | 2.882587 | 1.724887 |
| EGF        | 0.785981 | -0.45758 | 2.141989 | 1.724265 |
| OASL       | 0.78577  | 1.441034 | 3.097817 | 1.724013 |
| MUC5B      | 0.785727 | 6.585296 | 1.788664 | 1.723961 |
| SLC28A3    | 0.784503 | 3.628833 | 2.574978 | 1.722499 |
| C11orf86   | 0.784252 | 3.2291   | 2.194782 | 1.722199 |
| STX19      | 0.780797 | 2.157941 | 3.606698 | 1.718079 |
| ALDH3A1    | 0.780318 | 1.88238  | 2.167104 | 1.71751  |
| FAM83B     | 0.77989  | 2.245068 | 3.315089 | 1.716999 |

|          |          |          |          |          |
|----------|----------|----------|----------|----------|
| HHIP     | 0.777465 | 2.332269 | 2.914495 | 1.714117 |
| APOBEC1  | 0.771732 | 4.451296 | 2.136908 | 1.707318 |
| ARL14    | 0.771596 | 6.141638 | 2.307938 | 1.707158 |
| ACER2    | 0.769909 | 0.562279 | 3.90462  | 1.705163 |
| AMY1A    | 0.768485 | 0.665036 | 1.689157 | 1.70348  |
| BHLHA15  | 0.766278 | 1.035745 | 2.445375 | 1.700876 |
| LAMA3    | 0.763877 | 3.209131 | 3.445911 | 1.698047 |
| PLAC8    | 0.763575 | 3.724412 | 3.128725 | 1.697692 |
| ZG16B    | 0.761853 | 3.604737 | 2.556861 | 1.695668 |
| IMPA2    | 0.760173 | 0.395199 | 5.078067 | 1.693694 |
| ACTBL2   | 0.759749 | 2.047662 | 3.140496 | 1.693196 |
| ANKRD22  | 0.759278 | 2.222103 | 3.140936 | 1.692643 |
| DSG2     | 0.753074 | 1.838189 | 5.901564 | 1.68538  |
| ERBB3    | 0.752371 | 1.100858 | 4.578012 | 1.684559 |
| HKDC1    | 0.750958 | 4.071056 | 2.674721 | 1.68291  |
| GALNT3   | 0.750455 | 2.260315 | 4.356902 | 1.682323 |
| ESRP1    | 0.750446 | 2.110413 | 5.248754 | 1.682313 |
| HNF4G    | 0.750176 | 3.35369  | 3.370535 | 1.681998 |
| COL10A1  | 0.748453 | 5.035225 | 2.065399 | 1.679991 |
| UNC93A   | 0.746034 | 0.260528 | 3.266648 | 1.677176 |
| SPRR1B   | 0.741036 | 2.460727 | 1.565855 | 1.671375 |
| GCNT3    | 0.739258 | 6.293309 | 2.434519 | 1.669317 |
| S100A14  | 0.73863  | 2.841647 | 2.131269 | 1.66859  |
| SPINK4   | 0.738422 | 3.042445 | 1.473921 | 1.66835  |
| ARHGEF38 | 0.737851 | 1.872054 | 3.696776 | 1.66769  |
| FUT6     | 0.735916 | 4.47464  | 2.697692 | 1.665454 |
| SPRR1A   | 0.735574 | 1.93355  | 1.692724 | 1.66506  |
| EGLN3    | 0.73552  | 1.161731 | 2.977771 | 1.664998 |
| CTRL     | 0.734328 | 3.120654 | 1.301015 | 1.663623 |
| FCGBP    | 0.731513 | 1.726929 | 2.339954 | 1.660379 |
| MICALCL  | 0.730419 | 0.851949 | 4.029425 | 1.659121 |
| SLC13A5  | 0.729278 | 3.424935 | 1.642753 | 1.657809 |
| TMEM97   | 0.729218 | 0.313144 | 4.213466 | 1.65774  |
| DMBT1    | 0.727514 | 6.680586 | 1.480225 | 1.655783 |
| LPAR3    | 0.726265 | -1.02611 | 3.155393 | 1.65435  |
| SI       | 0.725846 | 1.638453 | 1.499073 | 1.65387  |
| FABP1    | 0.725605 | 1.350415 | 1.565963 | 1.653594 |
| LGR4     | 0.725384 | 0.663399 | 5.543613 | 1.653341 |
| GPR81    | 0.724389 | 0.408054 | 2.598652 | 1.6522   |
| LAMB3    | 0.724064 | 3.156419 | 2.352671 | 1.651829 |
| B3GNT7   | 0.721954 | 2.51758  | 3.357541 | 1.649414 |
| LRG1     | 0.72192  | 2.017164 | 3.036023 | 1.649376 |
| C1orf106 | 0.72062  | 3.029083 | 2.347709 | 1.64789  |
| KIAA0754 | 0.719802 | 0.934562 | 2.974955 | 1.646956 |
| RPSAP52  | 0.718957 | 1.64063  | 3.303137 | 1.645992 |
| KLF5     | 0.718874 | 2.301756 | 3.537086 | 1.645896 |

|               |          |          |          |          |
|---------------|----------|----------|----------|----------|
| DAZ1          | 0.718345 | 0.720196 | 1.508911 | 1.645294 |
| B3GALT5       | 0.717454 | 4.828087 | 2.882994 | 1.644278 |
| CASP14        | 0.717328 | -0.27336 | 2.421431 | 1.644135 |
| SLC9A4        | 0.714971 | 2.525387 | 1.662653 | 1.64145  |
| HOXB9         | 0.71486  | 1.47862  | 1.895681 | 1.641323 |
| CREB3L3       | 0.714015 | 2.062091 | 1.877675 | 1.640362 |
| VSIG2         | 0.712668 | 4.8949   | 2.033857 | 1.638833 |
| ERO1L         | 0.711405 | 0.919494 | 4.96189  | 1.637399 |
| UHMK1         | 0.709776 | -0.07784 | 3.617921 | 1.63555  |
| LRRC31        | 0.707094 | 2.115215 | 1.885381 | 1.632512 |
| FAT1          | 0.706413 | 0.97259  | 5.217492 | 1.631742 |
| MMP3          | 0.704618 | 1.733379 | 2.241859 | 1.629713 |
| BTNL8         | 0.703068 | 4.047771 | 1.738412 | 1.627963 |
| C3orf52       | 0.701596 | 1.795933 | 3.799715 | 1.626303 |
| IYD           | 0.701528 | 3.351696 | 2.05725  | 1.626227 |
| PDZK1IP1      | 0.700412 | 3.24739  | 2.264458 | 1.624969 |
| EPYC          | 0.699954 | 2.783277 | 1.506051 | 1.624453 |
| GATA4         | 0.699084 | 5.342343 | 2.22677  | 1.623473 |
| ADAMTS12      | 0.69841  | 2.45889  | 2.450477 | 1.622716 |
| IGF2BP3       | 0.696922 | 1.487328 | 2.21448  | 1.621042 |
| TNFRSF11B     | 0.696893 | 1.950092 | 2.617412 | 1.62101  |
| TMEM45B       | 0.696427 | 2.706634 | 3.02194  | 1.620486 |
| AADAC         | 0.696127 | 3.983295 | 2.138193 | 1.620149 |
| TRHDE         | 0.695157 | 1.433749 | 2.294787 | 1.61906  |
| PTK6          | 0.694075 | 2.80799  | 2.523665 | 1.617846 |
| TNFSF15       | 0.69329  | 0.557251 | 3.43609  | 1.616967 |
| TLR3          | 0.692855 | 0.736252 | 3.913288 | 1.616479 |
| RNF39         | 0.692639 | 1.726949 | 3.012022 | 1.616237 |
| STON1-GTF2A1L | 0.68967  | 0.664282 | 2.377286 | 1.612915 |
| ANKRD56       | 0.686627 | 1.204111 | 4.862424 | 1.609516 |
| KPNA7         | 0.686096 | 3.383165 | 2.717433 | 1.608923 |
| SERINC5       | 0.686035 | 0.134304 | 3.356832 | 1.608855 |
| TFAP2C        | 0.685765 | -1.48584 | 2.484176 | 1.608554 |
| FAM59A        | 0.685516 | 0.414642 | 5.535136 | 1.608277 |
| GJB2          | 0.684578 | 2.144397 | 2.242873 | 1.607232 |
| SPINK5        | 0.683616 | 1.738375 | 2.383487 | 1.606161 |
| CLDN4         | 0.683117 | 2.584789 | 3.404618 | 1.605605 |
| GPT2          | 0.680258 | -0.44675 | 4.533785 | 1.602427 |
| LAMC2         | 0.67829  | 4.129341 | 2.392868 | 1.600242 |
| DUSP4         | 0.678104 | 1.926457 | 5.057686 | 1.600036 |
| FAM83D        | 0.677665 | -0.16084 | 3.226678 | 1.599549 |
| PVRL4         | 0.677591 | 2.500103 | 2.113544 | 1.599466 |
| EPPK1         | 0.677534 | 1.056871 | 2.919391 | 1.599404 |
| MOGAT3        | 0.67629  | 1.545655 | 2.059407 | 1.598025 |
| GJB1          | 0.676288 | 3.801664 | 2.509042 | 1.598023 |
| HOXC11        | 0.675604 | 0.633794 | 1.729635 | 1.597265 |



|              |          |          |          |          |
|--------------|----------|----------|----------|----------|
| OCLN         | 0.674844 | 1.195066 | 4.861067 | 1.596424 |
| GPA33        | 0.673705 | 3.173669 | 2.114416 | 1.595164 |
| RHBDL2       | 0.672063 | 2.196133 | 3.035549 | 1.59335  |
| KIAA1199     | 0.670586 | 2.694494 | 2.555586 | 1.591719 |
| SLC9A2       | 0.667781 | 1.790246 | 1.97601  | 1.588628 |
| KRT6A        | 0.667545 | 2.675337 | 1.199406 | 1.588368 |
| IGF2BP2      | 0.665801 | 1.48543  | 3.105044 | 1.586449 |
| LOC100127888 | 0.665675 | 3.204526 | 2.332944 | 1.58631  |
| MEP1A        | 0.665434 | 1.139519 | 1.711766 | 1.586045 |
| XDH          | 0.664677 | 3.205719 | 2.37819  | 1.585214 |
| CDH3         | 0.664335 | 1.795385 | 2.734607 | 1.584838 |
| FCGR3B       | 0.663758 | 1.112422 | 2.039845 | 1.584204 |
| COL11A1      | 0.661684 | 4.097805 | 1.470785 | 1.581928 |
| SLC39A5      | 0.661289 | 3.962246 | 1.614617 | 1.581495 |
| FUT2         | 0.661115 | 3.604669 | 3.274475 | 1.581304 |
| B4GALNT2     | 0.660952 | -0.77716 | 2.44977  | 1.581126 |
| MST1R        | 0.660693 | 3.502768 | 2.438335 | 1.580842 |
| MIA2         | 0.660335 | 3.813104 | 2.74031  | 1.58045  |
| AGR3         | 0.660162 | 4.888252 | 1.996641 | 1.58026  |
| ATP8B1       | 0.659384 | 1.161809 | 5.287673 | 1.579408 |
| ADAM9        | 0.658518 | 1.158792 | 4.899471 | 1.578461 |
| RASSF6       | 0.658215 | 3.020569 | 4.051497 | 1.578129 |
| MUC1         | 0.656737 | 3.668089 | 2.310594 | 1.576513 |
| PRR11        | 0.656678 | -0.46857 | 2.730385 | 1.576449 |
| GJB3         | 0.654593 | 3.766767 | 2.028668 | 1.574172 |
| C14orf34     | 0.653174 | 1.561835 | 2.359971 | 1.572624 |
| CXCL17       | 0.653038 | 4.054921 | 1.635924 | 1.572476 |
| C20orf114    | 0.652447 | 3.187088 | 1.233773 | 1.571832 |
| PPP1R1B      | 0.648959 | 3.776974 | 1.761348 | 1.568037 |
| NPR3         | 0.647967 | 1.334424 | 2.516089 | 1.566958 |
| FOXA3        | 0.647657 | 5.738747 | 2.823994 | 1.566622 |
| TMEM92       | 0.646426 | 3.615664 | 2.389926 | 1.565285 |
| MYO5B        | 0.645632 | 0.939487 | 5.121354 | 1.564425 |
| IRF6         | 0.645052 | 1.293044 | 4.45604  | 1.563796 |
| LY6G6C       | 0.644773 | 0.086965 | 2.494272 | 1.563493 |
| MAP3K13      | 0.644649 | 0.976964 | 4.511612 | 1.563359 |
| ANXA3        | 0.644024 | 2.642917 | 2.675838 | 1.562682 |
| GATA5        | 0.643816 | -0.10967 | 1.849842 | 1.562457 |
| TEX11        | 0.643593 | 2.115248 | 2.178797 | 1.562215 |
| UGT8         | 0.642829 | 2.539979 | 3.437438 | 1.561388 |
| CLCN1        | 0.642406 | 2.170034 | 2.253366 | 1.560931 |
| CXCL5        | 0.641171 | 5.493161 | 1.367279 | 1.559595 |
| AREG         | 0.640597 | 2.705624 | 2.544574 | 1.558974 |
| DKK4         | 0.640165 | 2.05027  | 2.053222 | 1.558508 |
| XKR9         | 0.639639 | 1.763238 | 2.813322 | 1.557939 |
| ITGA2        | 0.639466 | 2.10116  | 3.723966 | 1.557752 |

## Supplementary Material

|           |          |          |          |          |
|-----------|----------|----------|----------|----------|
| PADI1     | 0.639412 | 5.264886 | 1.283342 | 1.557695 |
| WNT2      | 0.638505 | 2.579734 | 2.122486 | 1.556715 |
| PITX1     | 0.638394 | 2.245732 | 1.946102 | 1.556595 |
| MBNL3     | 0.637174 | 0.370933 | 3.626337 | 1.55528  |
| MPZL3     | 0.636587 | 1.010735 | 3.489109 | 1.554647 |
| MAL2      | 0.636465 | 2.175277 | 3.597943 | 1.554515 |
| B3GNT3    | 0.636334 | 4.657438 | 3.019204 | 1.554375 |
| HAS3      | 0.635795 | 0.205544 | 2.81179  | 1.553794 |
| HSD17B2   | 0.635695 | 5.542528 | 2.0727   | 1.553686 |
| LRRC8E    | 0.634913 | 0.6861   | 3.474176 | 1.552844 |
| GPR109B   | 0.633873 | -0.35825 | 2.386782 | 1.551725 |
| KLK6      | 0.63308  | 4.410482 | 1.324136 | 1.550872 |
| NBEAL1    | 0.632954 | 0.623042 | 3.50319  | 1.550737 |
| HRASLS2   | 0.63189  | 2.410228 | 1.920653 | 1.549594 |
| LPP       | 0.631889 | 0.503351 | 3.975494 | 1.549593 |
| TNFRSF10A | 0.630553 | 1.272107 | 3.540466 | 1.548159 |
| ANLN      | 0.628975 | 0.043592 | 2.88126  | 1.546466 |
| TMEM195   | 0.627184 | 2.103852 | 1.778942 | 1.544547 |
| MSLN      | 0.62671  | 6.132755 | 1.38034  | 1.54404  |
| MUC21     | 0.626019 | 0.235175 | 1.807308 | 1.543301 |
| CGN       | 0.625171 | 2.362616 | 3.926266 | 1.542394 |
| SSFA2     | 0.624357 | 0.82287  | 5.670749 | 1.541523 |
| FAM3D     | 0.623736 | 4.58971  | 1.595317 | 1.54086  |
| FAM108C1  | 0.623629 | 1.238152 | 3.754574 | 1.540745 |
| GPR87     | 0.623175 | 2.140335 | 1.512558 | 1.540261 |
| MECOM     | 0.622483 | 1.67198  | 3.813214 | 1.539523 |
| GALNT7    | 0.622466 | 0.612821 | 4.583137 | 1.539505 |
| CCL24     | 0.622276 | 2.385981 | 2.05968  | 1.539302 |
| PPAP2C    | 0.621922 | 2.017492 | 2.982079 | 1.538924 |
| SH3RF2    | 0.621338 | 2.602507 | 2.313695 | 1.538301 |
| CYP2C18   | 0.619448 | 5.065958 | 1.78883  | 1.536287 |
| ITGA6     | 0.618514 | 1.112898 | 4.6275   | 1.535293 |
| SFTA2     | 0.618167 | 5.398023 | 1.733184 | 1.534924 |
| DNAJC22   | 0.618014 | 1.827042 | 3.477428 | 1.534761 |
| SHH       | 0.617905 | 3.152606 | 2.261657 | 1.534645 |
| EPB41L4B  | 0.616106 | 1.311254 | 3.684393 | 1.532732 |
| GDPD2     | 0.615164 | 1.603101 | 1.988632 | 1.531733 |
| SH2D4A    | 0.614917 | 1.31121  | 3.732984 | 1.53147  |
| FGFBP1    | 0.614523 | 2.431399 | 1.676833 | 1.531052 |
| SLC30A2   | 0.614414 | 2.536901 | 1.463222 | 1.530936 |
| ZDHHC20   | 0.613426 | 0.562856 | 3.089375 | 1.529887 |
| EFNA2     | 0.612141 | 2.27501  | 2.185503 | 1.528525 |
| BTBD16    | 0.611073 | 1.853714 | 2.409784 | 1.527395 |
| UPK1B     | 0.610071 | 3.261252 | 1.24176  | 1.526335 |
| LCOR      | 0.610007 | 0.486156 | 3.260378 | 1.526267 |
| RHOF      | 0.609535 | 1.822365 | 2.742177 | 1.525768 |

|           |          |          |          |          |
|-----------|----------|----------|----------|----------|
| HK2       | 0.609314 | 0.504301 | 2.808375 | 1.525534 |
| ARL5B     | 0.609018 | 0.014034 | 5.372308 | 1.525221 |
| TJP3      | 0.609013 | 3.110067 | 2.364741 | 1.525215 |
| SLC34A2   | 0.6072   | 1.752796 | 1.627656 | 1.5233   |
| TRIM31    | 0.60613  | 5.361354 | 1.669679 | 1.522171 |
| LOC153328 | 0.606086 | -0.89103 | 3.498691 | 1.522124 |
| DNAH3     | 0.604531 | 1.379064 | 2.476299 | 1.520484 |
| C4orf19   | 0.604169 | 2.62148  | 3.602077 | 1.520103 |
| SLC38A5   | 0.603431 | 1.774597 | 1.976457 | 1.519325 |
| ANXA13    | 0.603237 | 4.164542 | 1.810421 | 1.519121 |
| LCN2      | 0.602742 | 6.025128 | 1.419112 | 1.5186   |
| PAX7      | 0.601637 | -0.25776 | 2.081501 | 1.517437 |
| C19orf33  | 0.601512 | 3.930233 | 1.798227 | 1.517306 |
| DSC2      | 0.601116 | 0.869057 | 4.595714 | 1.516889 |
| ARNTL2    | 0.601021 | 1.69877  | 3.918156 | 1.51679  |
| IGSF9     | 0.600763 | 1.247899 | 2.184257 | 1.516518 |
| PRKAA2    | 0.600195 | 0.375168 | 3.067104 | 1.515921 |
| MSX2      | 0.599961 | 1.50654  | 2.642971 | 1.515676 |
| EPS8L3    | 0.599757 | 7.995032 | 1.753581 | 1.515461 |
| TBX4      | 0.598827 | -0.7799  | 2.881837 | 1.514485 |
| GAN       | 0.596844 | 0.355477 | 4.79405  | 1.512404 |
| FAM25A    | 0.596239 | 0.091045 | 2.993465 | 1.51177  |
| UGT2B7    | 0.595532 | 2.560373 | 1.708488 | 1.51103  |
| WBSCR26   | 0.595506 | 2.749392 | 2.227551 | 1.511002 |
| SPDEF     | 0.594572 | 3.182807 | 1.863879 | 1.510025 |
| TACSTD2   | 0.594454 | 2.613173 | 1.906367 | 1.509901 |
| PTPLB     | 0.593828 | -0.11404 | 3.264325 | 1.509246 |
| KRT13     | 0.593462 | 1.528508 | 1.302373 | 1.508864 |
| RHOV      | 0.593225 | 1.530076 | 1.996961 | 1.508615 |
| SCEL      | 0.591938 | 3.721138 | 1.536589 | 1.507271 |
| CHMP4C    | 0.59174  | 1.657256 | 4.625498 | 1.507063 |
| PAQR5     | 0.590816 | 0.93351  | 3.053549 | 1.506099 |
| BCAT1     | 0.590701 | 0.908356 | 2.714207 | 1.505979 |
| GTF2A1    | 0.5894   | -0.2578  | 3.330031 | 1.504621 |
| REST      | 0.588903 | -0.11475 | 2.981179 | 1.504103 |
| RHPN2     | 0.588303 | 1.383183 | 3.449288 | 1.503478 |
| DDX60     | 0.586341 | 0.728089 | 3.732333 | 1.501434 |
| PRB1      | 0.582678 | 0.838628 | 2.365371 | 1.497626 |
| SLC2A1    | 0.582608 | 0.916859 | 2.652926 | 1.497554 |
| HHLA2     | 0.582466 | 4.813129 | 1.769147 | 1.497406 |
| TMC7      | 0.582165 | 2.167489 | 3.00102  | 1.497095 |
| GIPC2     | 0.581772 | 2.592847 | 2.868421 | 1.496687 |
| ADAP1     | 0.581751 | 2.226106 | 2.968868 | 1.496665 |
| PTPN14    | 0.581718 | 0.237297 | 4.104599 | 1.496663 |
| MMP1      | 0.581534 | 4.791043 | 1.490463 | 1.496439 |
| GPR35     | 0.580982 | 3.464784 | 2.453684 | 1.495867 |

## Supplementary Material

|          |          |          |          |          |
|----------|----------|----------|----------|----------|
| ZPLD1    | 0.580681 | 2.709147 | 1.964592 | 1.495555 |
| EPN3     | 0.580611 | 1.815645 | 2.210702 | 1.495483 |
| LOC93432 | 0.580584 | 2.91814  | 1.723067 | 1.495455 |
| KLK13    | 0.580057 | 0.179414 | 2.186225 | 1.494908 |
| KRT16    | 0.579105 | 3.931997 | 1.295048 | 1.493922 |
| SGMS2    | 0.578191 | 1.472175 | 4.62378  | 1.492976 |
| LEMD1    | 0.577023 | 3.450614 | 1.653288 | 1.491768 |
| PRAP1    | 0.576483 | 2.408642 | 1.209838 | 1.491209 |
| SLC2A10  | 0.576332 | 0.925115 | 3.74392  | 1.491054 |
| LUZP2    | 0.576128 | 0.954169 | 2.266743 | 1.490843 |
| SLCO4A1  | 0.575996 | 1.957324 | 2.657208 | 1.490707 |
| HAPLN1   | 0.575323 | -0.12153 | 1.891792 | 1.490011 |
| COL12A1  | 0.574744 | 2.209335 | 2.417476 | 1.489413 |
| PAR3B    | 0.574732 | 0.941063 | 2.89118  | 1.4894   |
| DUOX2    | 0.574548 | 5.710105 | 1.339606 | 1.48921  |
| HOXA11   | 0.574087 | -0.6721  | 1.621904 | 1.488735 |
| EPHA2    | 0.573499 | 2.043712 | 2.779913 | 1.488128 |
| ECT2     | 0.572992 | 0.225647 | 4.056789 | 1.487605 |
| STRN     | 0.572175 | -0.09829 | 3.815804 | 1.486763 |
| MGAT5    | 0.571185 | 0.419403 | 3.160451 | 1.485743 |
| GDA      | 0.570788 | 4.615526 | 2.051207 | 1.485335 |
| PSAT1    | 0.570662 | -1.59861 | 2.689129 | 1.485205 |
| METTL11B | 0.570551 | 0.912487 | 3.064355 | 1.48509  |
| MOCOS    | 0.570153 | 0.552712 | 3.130811 | 1.484681 |
| LONRF3   | 0.568848 | 1.363729 | 3.946491 | 1.483339 |
| NR1I2    | 0.568399 | 3.863247 | 1.544409 | 1.482877 |
| CXCL11   | 0.568103 | 0.110239 | 2.066337 | 1.482573 |
| CAPN8    | 0.568011 | 6.03774  | 1.726625 | 1.482479 |
| CD55     | 0.567947 | 1.806618 | 3.423416 | 1.482412 |
| TNNI3    | 0.566689 | 0.06548  | 1.794144 | 1.481121 |
| GREB1L   | 0.56625  | 0.782567 | 2.243052 | 1.48067  |
| IHH      | 0.56623  | 4.136121 | 1.600676 | 1.480649 |
| RASSF3   | 0.565809 | 0.398839 | 3.035156 | 1.480218 |
| HPDL     | 0.563979 | 0.646751 | 2.630833 | 1.478341 |
| CXorf61  | 0.563949 | 0.700604 | 1.627215 | 1.478311 |
| TSPAN1   | 0.563702 | 3.3308   | 2.415437 | 1.478057 |
| INPP4B   | 0.562316 | 1.976962 | 3.246121 | 1.476638 |
| PLA2G4F  | 0.56114  | 0.390745 | 2.086722 | 1.475435 |
| TC2N     | 0.559532 | 1.655375 | 4.233775 | 1.473791 |
| BTC      | 0.559413 | 0.968372 | 3.218445 | 1.473669 |
| DDI2     | 0.558539 | -0.25755 | 3.00358  | 1.472777 |
| ABP1     | 0.558473 | 4.603355 | 1.863529 | 1.472709 |
| ETV3     | 0.558159 | 0.107157 | 3.699214 | 1.472389 |
| KANK4    | 0.557158 | 2.27644  | 1.934703 | 1.471368 |
| MACC1    | 0.556543 | 2.519015 | 2.905928 | 1.47074  |
| MUC2     | 0.556423 | 1.998925 | 0.97766  | 1.470619 |

|           |          |          |          |          |
|-----------|----------|----------|----------|----------|
| MMP12     | 0.555823 | 2.633455 | 1.918414 | 1.470007 |
| FGFR2     | 0.555731 | 0.246294 | 2.435597 | 1.469913 |
| SLC25A21  | 0.55462  | -0.03377 | 3.109981 | 1.468781 |
| STYK1     | 0.554152 | 2.43433  | 2.403869 | 1.468305 |
| ATL3      | 0.553944 | 0.088122 | 5.25119  | 1.468094 |
| RNF128    | 0.552546 | 3.116316 | 2.99863  | 1.466671 |
| FAR2      | 0.552396 | 0.479825 | 3.346558 | 1.466519 |
| MFI2      | 0.552116 | 2.022681 | 2.267752 | 1.466235 |
| WBSCR27   | 0.552003 | 0.107293 | 2.509206 | 1.46612  |
| PI3       | 0.551595 | 3.36265  | 1.44501  | 1.465705 |
| DSC3      | 0.551548 | 0.117505 | 1.736702 | 1.465658 |
| TAOK1     | 0.551137 | 0.024357 | 3.09172  | 1.46524  |
| ACSL5     | 0.549917 | 1.949731 | 2.569944 | 1.464001 |
| CDHR2     | 0.54938  | 6.184954 | 1.474542 | 1.463456 |
| PRR15     | 0.548882 | 2.693412 | 2.646311 | 1.462951 |
| LOC201651 | 0.547127 | 1.766504 | 2.216637 | 1.461173 |
| DLGAP5    | 0.546841 | 0.164385 | 2.538123 | 1.460883 |
| EGFR      | 0.546213 | 0.181938 | 3.282618 | 1.460248 |
| ANPEP     | 0.545084 | 1.549054 | 1.833121 | 1.459105 |
| CLDN1     | 0.544616 | 1.772285 | 2.601091 | 1.458632 |
| BCL2L15   | 0.544356 | 5.124517 | 2.028791 | 1.458369 |
| TGFA      | 0.544226 | 1.492761 | 2.915006 | 1.458238 |
| F3        | 0.543539 | 2.622616 | 2.905406 | 1.457543 |
| REP15     | 0.543397 | 0.767973 | 2.359718 | 1.4574   |
| HPGD      | 0.541403 | 2.229396 | 2.147816 | 1.455388 |
| C17orf73  | 0.541095 | 2.943748 | 1.439571 | 1.455076 |
| CREB3L1   | 0.540266 | 3.118014 | 2.716214 | 1.45424  |
| PARD6B    | 0.539961 | 0.420798 | 4.035204 | 1.453933 |
| GPR126    | 0.539795 | 1.719349 | 2.591849 | 1.453766 |
| ASXL2     | 0.539581 | -0.0826  | 3.170209 | 1.45355  |
| CEP55     | 0.538771 | 0.330255 | 2.743667 | 1.452735 |
| CHRM3     | 0.538706 | 0.41403  | 2.216054 | 1.452668 |
| C9orf152  | 0.537772 | 3.770629 | 1.922407 | 1.451729 |
| GDF15     | 0.537461 | 0.597834 | 2.132719 | 1.451416 |
| HNF4A     | 0.536587 | 6.062346 | 2.449124 | 1.450537 |
| AZGP1     | 0.536163 | 2.074016 | 1.77724  | 1.450111 |
| CDCP1     | 0.536139 | 2.110076 | 4.047572 | 1.450087 |
| VWA2      | 0.535007 | 2.561477 | 2.380144 | 1.448949 |
| NEK2      | 0.534967 | 0.135263 | 2.660174 | 1.448909 |
| TCEA3     | 0.533922 | 0.368868 | 2.911265 | 1.44786  |
| SEL1L     | 0.533793 | 0.263556 | 4.98651  | 1.44773  |
| RASAL1    | 0.533629 | 2.469089 | 2.146774 | 1.447565 |
| DENND1B   | 0.533022 | -0.02028 | 3.676369 | 1.446957 |
| LGALS3    | 0.532893 | 1.326822 | 2.936546 | 1.446828 |
| DLX3      | 0.532609 | -1.12655 | 2.379257 | 1.446543 |
| SGK196    | 0.532363 | -0.2547  | 3.191676 | 1.446296 |

|           |          |          |          |          |
|-----------|----------|----------|----------|----------|
| PRSS12    | 0.53157  | 2.60815  | 2.63622  | 1.445502 |
| HIST1H2BN | 0.531417 | -0.62388 | 3.639439 | 1.445348 |
| NMU       | 0.530906 | 2.628939 | 1.463274 | 1.444836 |
| NFE2L3    | 0.53042  | 1.000828 | 3.987689 | 1.44435  |
| F2RL1     | 0.529548 | 2.279772 | 3.301408 | 1.443477 |
| BANF2     | 0.529213 | 0.283466 | 3.387859 | 1.443142 |
| C7orf10   | 0.528765 | 1.10071  | 2.191949 | 1.442694 |
| LANCL3    | 0.528673 | 1.055643 | 3.092469 | 1.442602 |
| TYRP1     | 0.528501 | 0.771528 | 2.112473 | 1.44243  |
| COL8A1    | 0.527871 | 2.031525 | 1.874436 | 1.4418   |
| DNASE1    | 0.526438 | 0.425836 | 2.917312 | 1.440369 |
| PROM2     | 0.526103 | 2.090485 | 1.625772 | 1.440034 |
| WDR72     | 0.525521 | 2.362812 | 1.324814 | 1.439453 |
| MMP7      | 0.525284 | 5.77453  | 1.313493 | 1.439217 |
| MYPN      | 0.524355 | 1.256678 | 2.530674 | 1.438291 |
| ERP27     | 0.523875 | 1.515639 | 1.343862 | 1.437812 |
| MUC15     | 0.523842 | 0.263668 | 1.37899  | 1.437779 |
| NPSR1     | 0.522709 | 2.873967 | 1.095417 | 1.43665  |
| PRELID2   | 0.522644 | 1.31234  | 4.275343 | 1.436586 |
| SLC27A2   | 0.522602 | -0.29327 | 2.394135 | 1.436544 |
| TMEM38A   | 0.521665 | 0.676497 | 3.402201 | 1.435611 |
| UGT1A6    | 0.521229 | 2.762482 | 1.4381   | 1.435177 |
| GCOM1     | 0.521216 | 2.217194 | 2.442924 | 1.435164 |
| GALNT4    | 0.519675 | 1.839358 | 2.774633 | 1.433632 |
| CBS       | 0.519136 | -1.25795 | 2.360148 | 1.433097 |
| ESYT3     | 0.518772 | 0.410524 | 2.759975 | 1.432735 |
| PIWIL2    | 0.518207 | 1.364316 | 2.398206 | 1.432174 |
| LASS6     | 0.517921 | 0.337563 | 4.679157 | 1.43189  |
| KCNK1     | 0.517921 | 2.119438 | 3.100912 | 1.43189  |
| SFTPA2    | 0.517805 | 1.050245 | 1.79991  | 1.431775 |
| CDH1      | 0.517543 | 1.702941 | 4.07099  | 1.431515 |
| ZNF704    | 0.517427 | -0.08271 | 3.19934  | 1.4314   |
| PTCHD3    | 0.517307 | 1.077624 | 2.137747 | 1.431281 |
| NCOA2     | 0.51716  | -0.23234 | 2.53482  | 1.431135 |
| FGFRL1    | 0.516118 | 0.099958 | 3.15763  | 1.430102 |
| HSD17B6   | 0.515749 | -0.27218 | 2.518823 | 1.429736 |
| ARHGAP32  | 0.515668 | 0.687601 | 4.901191 | 1.429656 |
| AK3L1     | 0.515221 | -0.3353  | 2.632217 | 1.429213 |
| PRRG4     | 0.514356 | 0.431832 | 4.195988 | 1.428356 |
| THBS2     | 0.513816 | 2.717779 | 2.171463 | 1.427822 |
| LEFTY1    | 0.513366 | 3.942897 | 1.107183 | 1.427377 |
| MKI67     | 0.512792 | 0.224682 | 2.714958 | 1.426808 |
| CDHR5     | 0.512693 | 5.332438 | 1.626137 | 1.426711 |
| SDC4      | 0.512208 | 0.945418 | 3.576471 | 1.426231 |
| OTX1      | 0.51197  | 0.238855 | 2.761949 | 1.425996 |
| FXYD3     | 0.511651 | 3.853279 | 2.229567 | 1.425681 |

|              |          |          |          |          |
|--------------|----------|----------|----------|----------|
| FKBP9L       | 0.511151 | 1.263772 | 3.609065 | 1.425187 |
| KRTCAP3      | 0.511145 | 1.910005 | 2.095031 | 1.425181 |
| C1orf130     | 0.510987 | 3.445086 | 2.321412 | 1.425025 |
| FBXW12       | 0.51084  | 0.516651 | 2.436222 | 1.424879 |
| IFI27        | 0.510522 | 1.441327 | 2.236054 | 1.424566 |
| FGD6         | 0.509458 | 1.042417 | 3.442251 | 1.423515 |
| SLC12A2      | 0.50886  | 1.167389 | 3.338142 | 1.422925 |
| ERN2         | 0.508025 | 7.202153 | 1.263117 | 1.422102 |
| CCDC155      | 0.507918 | -0.15601 | 3.378809 | 1.421996 |
| ASPH         | 0.50777  | 0.51244  | 3.904793 | 1.421851 |
| C12orf39     | 0.507026 | -1.15762 | 2.465302 | 1.421118 |
| NQO1         | 0.506776 | 1.666417 | 2.513626 | 1.420871 |
| LY6D         | 0.506774 | 2.727017 | 0.947844 | 1.420869 |
| VTCN1        | 0.505884 | 2.449704 | 1.583931 | 1.419993 |
| TMTC2        | 0.505872 | 0.650643 | 4.143325 | 1.419982 |
| MYOF         | 0.505299 | 1.195829 | 3.175234 | 1.419418 |
| ANO1         | 0.504201 | 2.573713 | 3.03791  | 1.418337 |
| ITGB4        | 0.50394  | 2.28089  | 2.026253 | 1.418081 |
| PPM1L        | 0.502844 | 0.215836 | 3.442977 | 1.417005 |
| KRT7         | 0.502335 | 4.135697 | 1.512934 | 1.416504 |
| HSN2         | 0.502116 | 0.286903 | 2.688406 | 1.41629  |
| TRIM15       | 0.502    | 5.081244 | 1.569372 | 1.416175 |
| DPEP1        | 0.501991 | 4.465042 | 1.835469 | 1.416167 |
| ARHGAP42     | 0.501488 | 0.635178 | 3.383284 | 1.415673 |
| CCDC68       | 0.500177 | 2.288126 | 3.045233 | 1.414387 |
| PCDH1        | 0.499632 | 1.742793 | 4.354158 | 1.413853 |
| WNT7A        | 0.499304 | 3.764683 | 1.247305 | 1.413531 |
| FAM190A      | 0.499269 | 1.07273  | 3.507277 | 1.413497 |
| SLC5A1       | 0.498497 | 4.69153  | 1.780952 | 1.412741 |
| LOC731779    | 0.498411 | 1.104793 | 1.990208 | 1.412657 |
| SH3RF1       | 0.496994 | 0.965242 | 4.961522 | 1.41127  |
| TMPRSS15     | 0.496263 | 1.064783 | 1.224702 | 1.410555 |
| SLC30A1      | 0.496254 | 0.189724 | 5.036966 | 1.410547 |
| UMOD         | 0.495735 | 0.304014 | 1.944895 | 1.410039 |
| ABCC3        | 0.495494 | 3.150209 | 2.06741  | 1.409803 |
| MUC13        | 0.494766 | 7.590866 | 1.606192 | 1.409092 |
| C16orf11     | 0.494562 | 0.000973 | 3.262627 | 1.408893 |
| STXBP6       | 0.494455 | 1.65046  | 2.614021 | 1.408788 |
| ATOH1        | 0.494295 | 0.760731 | 1.661901 | 1.408632 |
| PTGS2        | 0.494204 | 1.739444 | 1.791283 | 1.408544 |
| SOX11        | 0.494023 | 0.566791 | 1.770177 | 1.408367 |
| ALPI         | 0.49325  | 1.357984 | 1.411549 | 1.407612 |
| LOC100271831 | 0.49296  | 1.341031 | 1.782405 | 1.40733  |
| VIL1         | 0.492189 | 6.33512  | 1.616831 | 1.406578 |
| PGA5         | 0.492093 | 0.206567 | 1.606193 | 1.406484 |
| DUOXA2       | 0.491805 | 5.542204 | 1.14773  | 1.406203 |

|              |          |          |          |          |
|--------------|----------|----------|----------|----------|
| SDCBP2       | 0.491501 | 3.314081 | 2.376717 | 1.405907 |
| GPR110       | 0.491186 | 3.774366 | 1.429172 | 1.4056   |
| ALDH1L2      | 0.490836 | 1.31863  | 2.451127 | 1.405259 |
| FAM63B       | 0.490163 | 0.26157  | 3.270752 | 1.404603 |
| NMUR2        | 0.4897   | 3.124249 | 1.206442 | 1.404153 |
| LOC100188947 | 0.489119 | 0.041352 | 3.067251 | 1.403587 |
| BMPR1B       | 0.488927 | 0.318963 | 2.316128 | 1.403401 |
| GBP3         | 0.488519 | 0.926371 | 2.250561 | 1.403004 |
| C6orf132     | 0.488473 | 1.536757 | 2.394376 | 1.402959 |
| SAMD9        | 0.488462 | 1.257499 | 3.144449 | 1.402948 |
| GALNT6       | 0.487587 | 0.984441 | 2.426247 | 1.402098 |
| CASC5        | 0.487305 | -0.0768  | 2.466848 | 1.401824 |
| ANKFN1       | 0.485847 | 1.602069 | 1.907305 | 1.400408 |
| C6orf223     | 0.485419 | 3.119391 | 1.745185 | 1.399992 |
| ABO          | 0.484897 | 2.036112 | 1.658088 | 1.399486 |
| EDIL3        | 0.484806 | 1.818922 | 1.901347 | 1.399397 |
| PMAIP1       | 0.483856 | 0.163231 | 3.255383 | 1.398476 |
| FOXL1        | 0.483628 | 4.043702 | 1.971528 | 1.398256 |
| NCCRP1       | 0.482819 | 0.404165 | 1.362839 | 1.397472 |
| AQP2         | 0.480941 | 1.680956 | 1.773134 | 1.395654 |
| TMEM144      | 0.480163 | 0.380451 | 3.525844 | 1.394901 |
| RHCG         | 0.479943 | -0.49426 | 1.567666 | 1.394689 |
| SMPDL3B      | 0.479934 | 1.478726 | 2.809226 | 1.39468  |
| CKAP2L       | 0.479694 | -0.26632 | 2.699556 | 1.394448 |
| CCDC109A     | 0.479313 | 1.173404 | 4.120098 | 1.39408  |
| IL1RN        | 0.477967 | 2.15998  | 1.719233 | 1.39278  |
| FAM114A1     | 0.477521 | 0.700905 | 3.993785 | 1.392349 |
| INHA         | 0.47752  | 1.176434 | 1.902035 | 1.392348 |
| SLC44A4      | 0.477452 | 4.576925 | 1.973932 | 1.392282 |
| RAET1L       | 0.477299 | 1.780944 | 1.688032 | 1.392135 |
| KLHDC7A      | 0.47688  | 1.742612 | 1.964692 | 1.39173  |
| RPS27        | 0.476833 | 0.484538 | 1.762445 | 1.391685 |
| AMY2B        | 0.476724 | 2.551266 | 1.072504 | 1.39158  |
| BARX2        | 0.47635  | 2.409965 | 1.878997 | 1.39122  |
| PYCR1        | 0.475961 | 0.408227 | 3.430312 | 1.390844 |
| P2RY2        | 0.47588  | 0.662809 | 2.210296 | 1.390766 |
| CTSL2        | 0.475641 | 0.310423 | 2.258734 | 1.390536 |
| PHGR1        | 0.47545  | 3.612175 | 1.102146 | 1.390351 |
| EXOC6B       | 0.47437  | -0.09772 | 3.083079 | 1.389311 |
| CEACAM20     | 0.474258 | 0.397854 | 2.016047 | 1.389203 |
| OAS1         | 0.474084 | 0.707167 | 2.746088 | 1.389036 |
| HABP2        | 0.474041 | 4.873295 | 1.229722 | 1.388995 |
| LEPROT       | 0.473788 | 0.297958 | 3.33419  | 1.388751 |
| SRD5A3       | 0.472858 | 0.983281 | 3.742664 | 1.387856 |
| EPCAM        | 0.472817 | 3.001685 | 3.45131  | 1.387817 |
| BSPRY        | 0.472407 | 1.363828 | 3.53322  | 1.387422 |



|           |          |          |          |          |
|-----------|----------|----------|----------|----------|
| SERTAD4   | 0.472215 | 0.061978 | 2.52362  | 1.387238 |
| C9orf129  | 0.472207 | 0.263375 | 3.072584 | 1.38723  |
| DOCK5     | 0.472006 | 1.091175 | 2.830578 | 1.387037 |
| YIPF6     | 0.471176 | -0.01157 | 5.960836 | 1.386239 |
| BRIP1     | 0.471083 | -0.76251 | 2.702446 | 1.38615  |
| LMTK2     | 0.47105  | 0.308221 | 3.148771 | 1.386118 |
| LAD1      | 0.470368 | 3.553586 | 2.230847 | 1.385463 |
| CYP3A7    | 0.470094 | 1.281962 | 2.356839 | 1.385199 |
| HS3ST1    | 0.469735 | 2.293309 | 2.270929 | 1.384855 |
| GRHL1     | 0.469295 | 0.094505 | 2.856851 | 1.384433 |
| TMBIM1    | 0.468904 | 1.306387 | 4.508646 | 1.384058 |
| SLC44A1   | 0.468493 | 0.512266 | 5.099967 | 1.383663 |
| KIF14     | 0.468339 | -0.13244 | 2.332177 | 1.383515 |
| SLC4A4    | 0.468156 | 3.329763 | 1.334491 | 1.38334  |
| BACH1     | 0.468147 | 0.223158 | 4.78456  | 1.383332 |
| SLK       | 0.467614 | 0.664269 | 4.786411 | 1.382821 |
| HPSE      | 0.466879 | 0.804909 | 3.631763 | 1.382116 |
| PDZD8     | 0.46685  | 0.82725  | 3.876278 | 1.382089 |
| CENPI     | 0.466587 | -0.52963 | 2.641307 | 1.381837 |
| ATE1      | 0.466355 | -0.04496 | 3.738965 | 1.381614 |
| RAB11FIP1 | 0.46629  | 1.481863 | 4.041309 | 1.381552 |
| RRM2      | 0.465747 | -0.13458 | 2.550341 | 1.381032 |
| RCC1      | 0.464837 | -0.27004 | 2.754164 | 1.380162 |
| SLC35A3   | 0.464597 | 0.160703 | 4.378525 | 1.379932 |
| ANKS4B    | 0.464572 | 4.906031 | 1.66949  | 1.379908 |
| SLC16A1   | 0.463856 | -0.20381 | 3.194625 | 1.379223 |
| ILDR1     | 0.46356  | 1.691628 | 3.109349 | 1.378941 |
| RBM47     | 0.463492 | 0.701533 | 4.480267 | 1.378875 |
| FRK       | 0.463086 | 1.10827  | 3.367739 | 1.378488 |
| ABHD2     | 0.463071 | 1.363581 | 3.624588 | 1.378473 |
| TMPPE     | 0.462166 | 0.149197 | 4.210951 | 1.377609 |
| E2F8      | 0.462007 | 0.096617 | 2.337085 | 1.377457 |
| EPO       | 0.461736 | -0.1804  | 2.028098 | 1.377198 |
| CYP3A4    | 0.461606 | 1.577495 | 1.347744 | 1.377074 |
| TOP2A     | 0.461248 | -0.22087 | 2.491178 | 1.376732 |
| HS3ST5    | 0.460811 | 1.055534 | 1.895189 | 1.376315 |
| CD9       | 0.460583 | -0.32119 | 3.417741 | 1.376098 |
| TMEM159   | 0.46055  | 0.560329 | 3.995575 | 1.376066 |
| PRSS16    | 0.459406 | 1.335707 | 2.618901 | 1.374976 |
| HMMR      | 0.45919  | -0.04422 | 2.722579 | 1.37477  |
| ANXA2P3   | 0.458643 | 0.605824 | 2.698176 | 1.374249 |
| ESCO2     | 0.458577 | -0.15968 | 2.77579  | 1.374185 |
| OLFM4     | 0.458366 | 9.081458 | 0.846814 | 1.373985 |
| FABP2     | 0.458304 | 1.534283 | 1.163114 | 1.373926 |
| CCNT1     | 0.45813  | -0.17099 | 2.397434 | 1.37376  |
| SERPINB2  | 0.458049 | 3.627075 | 1.284116 | 1.373683 |

|          |          |          |          |          |
|----------|----------|----------|----------|----------|
| LMO7     | 0.457813 | 1.943687 | 3.498819 | 1.373459 |
| C12orf56 | 0.457733 | -0.68941 | 1.87872  | 1.373382 |
| FLNB     | 0.457671 | 1.010022 | 3.128887 | 1.373323 |
| LYPD2    | 0.45764  | 2.111267 | 0.989685 | 1.373293 |
| IPMK     | 0.457594 | -0.14988 | 2.651983 | 1.373249 |
| GALE     | 0.457544 | 0.771706 | 3.018784 | 1.373202 |
| POTEE    | 0.457407 | -0.34049 | 3.238993 | 1.373072 |
| NEBL     | 0.456863 | 0.462934 | 3.362097 | 1.372554 |
| CLCN3    | 0.45682  | 0.295578 | 4.330573 | 1.372513 |
| CDC25C   | 0.456807 | -0.15511 | 2.322461 | 1.372501 |
| SOX9     | 0.455947 | 1.552771 | 3.015876 | 1.371683 |
| MYLK2    | 0.455617 | 0.861734 | 1.526212 | 1.37137  |
| CCNI2    | 0.455408 | 1.766696 | 2.632901 | 1.37117  |
| FAM111B  | 0.455273 | -0.41766 | 2.786013 | 1.371042 |
| MYO1E    | 0.454918 | 1.119771 | 4.052685 | 1.370705 |
| FRRS1    | 0.454868 | 0.475374 | 2.08538  | 1.370658 |
| BMP4     | 0.454437 | 2.273564 | 2.241141 | 1.370248 |
| SLC16A7  | 0.454393 | 1.530966 | 2.176662 | 1.370206 |
| NHLRC2   | 0.454198 | 0.042246 | 3.810348 | 1.370021 |
| CD109    | 0.454099 | 0.475169 | 2.175926 | 1.369927 |
| INSL4    | 0.454055 | 0.139216 | 2.751246 | 1.369885 |
| PLEKHG6  | 0.453863 | 2.381015 | 2.953383 | 1.369703 |
| SPP1     | 0.453574 | 2.014731 | 1.640549 | 1.369428 |
| EIF2AK2  | 0.453437 | 0.042043 | 4.009996 | 1.369298 |
| A2ML1    | 0.453178 | 0.28266  | 0.847322 | 1.369053 |
| UGT1A9   | 0.45291  | 2.220075 | 1.163775 | 1.368799 |
| PLA2R1   | 0.452546 | 1.082812 | 2.545137 | 1.368453 |
| SGPP2    | 0.452258 | 2.110333 | 2.62693  | 1.36818  |
| PPARG    | 0.451976 | 1.917385 | 2.168494 | 1.367912 |
| KCNN4    | 0.451802 | 2.940806 | 1.535672 | 1.367747 |
| CLSPN    | 0.451654 | -0.59648 | 2.237714 | 1.367607 |
| IL1RAP   | 0.45162  | 0.573119 | 2.632825 | 1.367575 |
| PCDHGA10 | 0.451557 | 0.076376 | 1.914948 | 1.367516 |
| NPTX1    | 0.451453 | 3.284599 | 1.730737 | 1.367417 |
| REEP3    | 0.450845 | 0.471797 | 4.541107 | 1.366841 |
| CLOCK    | 0.450761 | 0.135227 | 3.268696 | 1.366761 |
| DIAPH2   | 0.449944 | 0.518908 | 4.813196 | 1.365987 |
| WNT5A    | 0.449896 | 0.969127 | 2.267021 | 1.365942 |
| REL      | 0.449706 | 0.204558 | 2.712297 | 1.365762 |
| SHANK2   | 0.449129 | 0.615384 | 3.104963 | 1.365216 |
| FAM196B  | 0.447991 | -0.31072 | 2.280087 | 1.364139 |
| CD2AP    | 0.447488 | 0.68943  | 4.51769  | 1.363664 |
| CPA4     | 0.4474   | 0.353399 | 1.725473 | 1.363581 |
| TDRD1    | 0.445579 | 0.850581 | 1.585156 | 1.361861 |
| CCL20    | 0.445538 | 2.868722 | 1.331389 | 1.361822 |
| GPR109A  | 0.444995 | -0.34885 | 1.600008 | 1.36131  |

|           |          |          |          |          |
|-----------|----------|----------|----------|----------|
| SLC16A10  | 0.444921 | 0.907595 | 2.384149 | 1.361239 |
| TOB1      | 0.444723 | 0.622403 | 3.840682 | 1.361052 |
| LOC284441 | 0.44439  | -0.05681 | 3.144275 | 1.360739 |
| LY75      | 0.444236 | 1.67504  | 2.257181 | 1.360593 |
| LYZ       | 0.44413  | 3.333715 | 1.503094 | 1.360493 |
| SCN5A     | 0.443673 | 0.517591 | 2.153613 | 1.360062 |
| FAM55B    | 0.442841 | 0.402871 | 2.265887 | 1.359279 |
| FZD5      | 0.442773 | 0.874353 | 3.631822 | 1.359214 |
| SPAG4     | 0.442752 | 1.005628 | 2.633904 | 1.359194 |
| PAWR      | 0.44275  | 0.357987 | 4.860965 | 1.359192 |
| CRCT1     | 0.441933 | 1.588661 | 1.298722 | 1.358423 |
| GPC4      | 0.441878 | 0.719659 | 3.327617 | 1.358372 |
| LDLR      | 0.441692 | 1.908699 | 2.611755 | 1.358196 |
| KIF18A    | 0.441506 | -0.54437 | 2.452195 | 1.358021 |
| PPP2R2C   | 0.441029 | 1.226857 | 1.48123  | 1.357573 |
| ANTXR2    | 0.440612 | 1.695038 | 3.06048  | 1.35718  |
| TNFRSF11A | 0.44051  | 2.251925 | 2.352921 | 1.357084 |
| ZNF702P   | 0.439393 | 0.109551 | 2.21147  | 1.356034 |
| SMAGP     | 0.438917 | 1.524158 | 2.902227 | 1.355586 |
| PPY       | 0.438769 | 7.96182  | 0.645799 | 1.355448 |
| C5orf46   | 0.438729 | 2.858367 | 1.560809 | 1.35541  |
| FBP2      | 0.438667 | 1.280782 | 1.521808 | 1.355351 |
| MMEL1     | 0.438609 | 2.043242 | 1.807916 | 1.355297 |
| HECW1     | 0.438232 | 0.950251 | 1.707341 | 1.354943 |
| DEPDC1    | 0.437866 | -0.4974  | 2.314862 | 1.354599 |
| OAS3      | 0.437832 | 0.226607 | 2.914291 | 1.354567 |
| UGCG      | 0.437772 | 0.419098 | 2.832697 | 1.354511 |
| LIMS1     | 0.437368 | 0.347823 | 2.818963 | 1.354131 |
| IQGAP2    | 0.437228 | 1.123002 | 2.494407 | 1.354    |
| C1orf116  | 0.436461 | 3.28464  | 2.689352 | 1.353281 |
| P4HA1     | 0.436412 | 0.128346 | 3.655316 | 1.353235 |
| ECM1      | 0.436339 | 1.479901 | 2.159067 | 1.353166 |
| ENTPD8    | 0.436196 | 2.911365 | 1.632133 | 1.353032 |
| SEMG1     | 0.436039 | 1.294766 | 1.802379 | 1.352885 |
| AKR1B10   | 0.435918 | 3.991404 | 1.039569 | 1.352771 |
| RIF1      | 0.43568  | -0.01346 | 3.539184 | 1.352548 |
| PLOD2     | 0.435679 | 0.164538 | 2.634941 | 1.352548 |
| MYOM3     | 0.435564 | 2.35061  | 1.820022 | 1.35244  |
| C10orf118 | 0.435332 | 0.481933 | 3.731214 | 1.352222 |
| PBK       | 0.435282 | -0.4821  | 2.542252 | 1.352175 |
| HIST1H2BC | 0.434942 | 0.0757   | 2.259595 | 1.351856 |
| PCSK9     | 0.434811 | 2.940431 | 1.693722 | 1.351733 |
| EVPL      | 0.434787 | 1.68783  | 1.583339 | 1.351711 |
| SEC14L4   | 0.434031 | 1.646566 | 1.783691 | 1.351003 |
| DPP10     | 0.433856 | 0.524949 | 1.330762 | 1.350839 |
| TPX2      | 0.433713 | -0.33053 | 2.333873 | 1.350705 |

## Supplementary Material

|           |          |          |          |          |
|-----------|----------|----------|----------|----------|
| CXCR1     | 0.432808 | 1.158241 | 1.637316 | 1.349858 |
| PTGES     | 0.432631 | 1.459715 | 1.667862 | 1.349693 |
| EPR1      | 0.432406 | -0.26478 | 2.125426 | 1.349482 |
| NRG4      | 0.432339 | 1.070182 | 1.625578 | 1.349419 |
| MAN2A1    | 0.432138 | 0.405638 | 2.846442 | 1.349231 |
| C8orf12   | 0.432088 | 0.032232 | 2.346807 | 1.349185 |
| STK31     | 0.431979 | 1.856821 | 1.598244 | 1.349083 |
| SLC5A3    | 0.431667 | -0.82495 | 3.738585 | 1.348791 |
| NR4A2     | 0.431595 | 0.126288 | 2.272321 | 1.348724 |
| TMEM125   | 0.431449 | 1.91605  | 2.895605 | 1.348587 |
| CST4      | 0.431043 | 3.249536 | 1.447127 | 1.348208 |
| SH2D3A    | 0.430423 | 2.097025 | 1.750132 | 1.347628 |
| DSG4      | 0.430287 | 0.266195 | 2.808325 | 1.347501 |
| CBLC      | 0.429588 | 3.220658 | 2.147797 | 1.346849 |
| FGL1      | 0.429372 | 3.218614 | 0.914917 | 1.346647 |
| CLDN7     | 0.429313 | 2.049049 | 2.941926 | 1.346592 |
| C4BPA     | 0.429253 | 3.897109 | 1.054871 | 1.346536 |
| C6orf150  | 0.428519 | 0.694411 | 3.107523 | 1.345852 |
| BATF2     | 0.428215 | 0.791924 | 3.067849 | 1.345568 |
| CLDN23    | 0.428019 | 1.897883 | 2.088529 | 1.345385 |
| TOX3      | 0.427978 | 2.946714 | 1.987013 | 1.345347 |
| KRT23     | 0.427853 | 3.596988 | 1.268622 | 1.34523  |
| VNN1      | 0.427795 | 3.770656 | 1.404856 | 1.345176 |
| FGG       | 0.427391 | 3.666825 | 0.904155 | 1.3448   |
| FOXQ1     | 0.427259 | 3.34476  | 1.873538 | 1.344677 |
| LNPEP     | 0.426776 | 0.150209 | 3.254122 | 1.344226 |
| RETNLB    | 0.426759 | 0.074588 | 2.190903 | 1.344211 |
| FNIP2     | 0.426721 | 0.489282 | 2.773895 | 1.344175 |
| PKP2      | 0.42659  | 1.844626 | 2.669006 | 1.344053 |
| AP1S3     | 0.426412 | 1.634503 | 2.824975 | 1.343887 |
| MAB21L2   | 0.426018 | 3.051809 | 1.231671 | 1.34352  |
| BUB1      | 0.425926 | -0.22826 | 2.352325 | 1.343434 |
| GAS2L3    | 0.425918 | 0.016541 | 1.974765 | 1.343427 |
| IRAK2     | 0.425883 | 1.387386 | 2.750366 | 1.343394 |
| BACE2     | 0.425813 | 1.619845 | 2.814995 | 1.343329 |
| BAG4      | 0.425173 | -0.24585 | 3.93794  | 1.342734 |
| ITGA11    | 0.425152 | 2.339011 | 1.734577 | 1.342714 |
| LOC641298 | 0.424852 | -0.04178 | 1.82692  | 1.342435 |
| SYTL4     | 0.424441 | 1.094307 | 3.243889 | 1.342052 |
| GPR115    | 0.423527 | 3.186686 | 1.693714 | 1.341202 |
| TCF7L2    | 0.423283 | 0.806367 | 3.653411 | 1.340975 |
| C4BPB     | 0.42328  | 4.388281 | 1.393234 | 1.340973 |
| PTAFR     | 0.42323  | 1.206148 | 2.23543  | 1.340926 |
| BCMO1     | 0.423091 | 2.290428 | 2.151778 | 1.340797 |
| NTN4      | 0.422795 | 1.021779 | 2.910152 | 1.340522 |
| FN1       | 0.422749 | 1.409428 | 1.737176 | 1.340479 |

|              |          |          |          |          |
|--------------|----------|----------|----------|----------|
| ASPM         | 0.422548 | -0.03083 | 2.108612 | 1.340292 |
| KIF20A       | 0.422444 | -0.2833  | 2.209205 | 1.340196 |
| KRT18        | 0.421216 | 2.191715 | 2.823525 | 1.339056 |
| TMEM139      | 0.42027  | 2.033879 | 1.962364 | 1.338178 |
| HIST1H2BJ    | 0.420131 | -0.14714 | 2.012198 | 1.338049 |
| C20orf151    | 0.420071 | 1.172312 | 1.699874 | 1.337993 |
| MBOAT2       | 0.419505 | 0.723641 | 2.950601 | 1.337468 |
| C1orf58      | 0.419163 | -0.0116  | 3.486561 | 1.337152 |
| E2F7         | 0.419145 | -0.30872 | 2.096784 | 1.337135 |
| PARD3        | 0.418951 | 0.095414 | 5.365957 | 1.336955 |
| EXPH5        | 0.418891 | 0.585871 | 3.551021 | 1.336899 |
| FLJ23867     | 0.418817 | 2.038423 | 2.037916 | 1.336831 |
| ASAM         | 0.418698 | 1.622913 | 1.554973 | 1.336721 |
| KRT80        | 0.418477 | 2.068939 | 1.690252 | 1.336516 |
| CLDN10       | 0.418416 | 4.817734 | 0.985902 | 1.33646  |
| PPP1R3B      | 0.418198 | 0.064296 | 3.827566 | 1.336258 |
| SHROOM3      | 0.418172 | 2.197081 | 3.483899 | 1.336233 |
| BARD1        | 0.417723 | -0.21564 | 2.259614 | 1.335818 |
| DIAPH3       | 0.416984 | -0.11538 | 2.399273 | 1.335133 |
| TSPAN15      | 0.416601 | 1.644594 | 2.773331 | 1.334779 |
| CHRNA5       | 0.416597 | 1.352062 | 2.394859 | 1.334775 |
| PRSS22       | 0.416253 | 3.790637 | 1.7657   | 1.334457 |
| TMEM30B      | 0.415762 | 1.965909 | 3.408434 | 1.334003 |
| GSTT1        | 0.415713 | 0.683348 | 0.800756 | 1.333958 |
| C15orf38     | 0.415554 | 0.12167  | 4.877177 | 1.333811 |
| LOXL2        | 0.414442 | 1.304646 | 2.160281 | 1.332783 |
| IDE          | 0.413981 | -0.02364 | 4.009394 | 1.332357 |
| AMIGO2       | 0.413941 | 1.774992 | 2.278347 | 1.332321 |
| COBL         | 0.413648 | 1.0249   | 2.985651 | 1.33205  |
| GPR160       | 0.413519 | 0.518035 | 2.873001 | 1.331931 |
| SPACA3       | 0.413325 | 0.922373 | 1.637673 | 1.331752 |
| ANXA2P1      | 0.41301  | 1.364924 | 2.582387 | 1.331461 |
| HNF1B        | 0.412958 | 5.074307 | 1.488764 | 1.331413 |
| GDNF         | 0.412626 | -0.00467 | 2.733256 | 1.331107 |
| KLHL23       | 0.412231 | 0.216035 | 2.351889 | 1.330742 |
| ST14         | 0.411552 | 2.006827 | 2.869284 | 1.330116 |
| NCEH1        | 0.411479 | 0.705779 | 3.308848 | 1.330049 |
| ARL6IP1      | 0.411442 | 0.119115 | 4.565281 | 1.330014 |
| IGFBP1       | 0.411222 | 2.568303 | 1.181513 | 1.329812 |
| SERPINA4     | 0.411103 | 7.151679 | 1.173002 | 1.329702 |
| AHNAK2       | 0.411074 | 1.888905 | 1.452232 | 1.329675 |
| ? 652919     | 0.409973 | 0.179548 | 1.202296 | 1.328661 |
| NAALADL2     | 0.409845 | 1.067705 | 2.728857 | 1.328543 |
| ALB          | 0.40944  | 2.730791 | 0.821896 | 1.32817  |
| LOC100124692 | 0.409015 | 4.307025 | 1.078182 | 1.327779 |
| UEVLD        | 0.408925 | 0.057104 | 4.486642 | 1.327696 |

|          |          |          |          |          |
|----------|----------|----------|----------|----------|
| PLEKHA7  | 0.408502 | 1.334576 | 2.943139 | 1.327307 |
| MME      | 0.408471 | -0.27816 | 1.551322 | 1.327278 |
| CDA      | 0.408335 | 1.858416 | 1.639893 | 1.327153 |
| ROR1     | 0.408302 | 1.640763 | 2.096946 | 1.327123 |
| SPRR3    | 0.408241 | 3.114098 | 0.830879 | 1.327067 |
| UGT1A7   | 0.408161 | -0.35474 | 1.805214 | 1.326994 |
| SLC41A2  | 0.407995 | 1.468717 | 2.864435 | 1.32684  |
| BAIAP2L1 | 0.407818 | 1.918711 | 2.825984 | 1.326678 |
| ELOVL6   | 0.407763 | 0.363729 | 3.208627 | 1.326628 |
| KALRN    | 0.407579 | 1.126411 | 3.001365 | 1.326458 |
| PRB2     | 0.407185 | 0.809622 | 1.603377 | 1.326096 |
| ANXA4    | 0.407162 | 2.338795 | 2.285532 | 1.326074 |
| EPHB6    | 0.407101 | 1.501762 | 1.819301 | 1.326018 |
| TMPRSS3  | 0.406877 | 4.151331 | 1.558453 | 1.325812 |
| FAM83G   | 0.406767 | 1.095156 | 3.029655 | 1.325711 |
| CEACAM18 | 0.406714 | 1.369361 | 1.440665 | 1.325663 |
| CCRL1    | 0.406511 | 1.911025 | 2.084925 | 1.325476 |
| EPHX4    | 0.406501 | 1.381563 | 1.907973 | 1.325467 |
| SEMA4B   | 0.406237 | 0.764713 | 3.050799 | 1.325224 |
| PRKG1    | 0.406213 | 1.383562 | 1.842054 | 1.325203 |
| VILL     | 0.40616  | 3.342886 | 1.64965  | 1.325154 |
| CDCA7    | 0.405938 | 0.913553 | 1.513292 | 1.32495  |
| KIF23    | 0.405449 | -0.2341  | 2.395697 | 1.324501 |
| ZNF217   | 0.405338 | -0.13854 | 3.503843 | 1.324399 |
| SCUBE3   | 0.405274 | 0.6903   | 1.457186 | 1.32434  |
| GULP1    | 0.405047 | 1.428751 | 2.87672  | 1.324132 |
| STK38L   | 0.405019 | 0.883282 | 4.215662 | 1.324106 |
| PLA2G4A  | 0.404919 | 1.345319 | 2.517408 | 1.324015 |
| MTFR1    | 0.404703 | -0.27304 | 5.670109 | 1.323816 |
| GPR128   | 0.404445 | 2.598253 | 1.080911 | 1.32358  |
| RAB3D    | 0.404135 | -0.14919 | 3.951974 | 1.323295 |
| SULF1    | 0.403992 | 2.615025 | 1.668268 | 1.323164 |
| KIAA1211 | 0.403788 | 2.38051  | 2.370809 | 1.322977 |
| ANO6     | 0.403279 | 0.185655 | 3.627921 | 1.32251  |
| C10orf12 | 0.403114 | 0.204153 | 3.866664 | 1.322359 |
| SULT2B1  | 0.402303 | 1.408209 | 1.481796 | 1.321616 |
| HAVCR1   | 0.402295 | 0.996099 | 1.309291 | 1.321609 |
| ELF3     | 0.402081 | 3.443389 | 2.053575 | 1.321412 |
| CDS1     | 0.401403 | 1.009695 | 3.478204 | 1.320792 |
| PAIP2B   | 0.401394 | -0.75251 | 1.860892 | 1.320783 |
| TAF1L    | 0.401298 | -0.16873 | 3.131347 | 1.320696 |
| MELK     | 0.40116  | -0.05986 | 1.912869 | 1.320569 |
| FAM13A   | 0.400985 | 0.270136 | 3.325868 | 1.320409 |
| NGEF     | 0.400916 | 1.55267  | 1.716675 | 1.320346 |
| SYTL2    | 0.400304 | 1.281015 | 2.440079 | 1.319786 |
| EIF2C2   | 0.399972 | 0.168466 | 3.721712 | 1.319482 |

|          |          |          |          |          |
|----------|----------|----------|----------|----------|
| APOOL    | 0.399887 | -0.42952 | 3.135391 | 1.319405 |
| RC3H2    | 0.399786 | -0.06312 | 3.570703 | 1.319312 |
| GRB7     | 0.399652 | 2.011167 | 2.53177  | 1.31919  |
| TSPAN5   | 0.399483 | 0.161331 | 2.529898 | 1.319035 |
| KCNE3    | 0.39893  | 1.838982 | 1.846071 | 1.31853  |
| ASAP2    | 0.398489 | 0.96649  | 3.443914 | 1.318127 |
| PANK3    | 0.398173 | 0.039621 | 4.095219 | 1.317838 |
| ANTXR1   | 0.398164 | 1.405677 | 2.005198 | 1.31783  |
| ERN1     | 0.398149 | 0.571671 | 2.076846 | 1.317816 |
| C4orf36  | 0.398047 | -0.05591 | 3.053059 | 1.317723 |
| MIPOL1   | 0.397879 | 0.391962 | 3.691198 | 1.317569 |
| PPTC7    | 0.397075 | 0.038075 | 2.780577 | 1.316835 |
| MARVELD3 | 0.396848 | 1.571982 | 3.389197 | 1.316628 |
| TRIM40   | 0.396766 | 1.229421 | 1.632541 | 1.316553 |
| PRRG1    | 0.396365 | 0.795362 | 3.476915 | 1.316187 |
| SPOCK1   | 0.396054 | 0.925558 | 1.809174 | 1.315904 |
| KIAA1522 | 0.395922 | 0.684624 | 3.254072 | 1.315783 |
| CXCR2    | 0.395804 | 0.483821 | 1.479972 | 1.315676 |
| BAGE2    | 0.395657 | -0.26413 | 2.902602 | 1.315542 |
| DNMBP    | 0.395594 | 0.88439  | 3.857769 | 1.315484 |
| AZIN1    | 0.395472 | -0.07031 | 6.152577 | 1.315373 |
| ABTB2    | 0.395236 | 0.736216 | 2.459927 | 1.315158 |
| EPS8     | 0.395112 | 0.989672 | 3.082037 | 1.315045 |
| KRT6C    | 0.395103 | 1.471397 | 0.994665 | 1.315037 |
| TGIF1    | 0.394916 | 0.132983 | 2.923011 | 1.314866 |
| SLC39A8  | 0.394614 | -0.36978 | 3.091227 | 1.314591 |
| C1QL3    | 0.39458  | -0.18102 | 1.794586 | 1.31456  |
| MYO5C    | 0.39391  | 1.346467 | 3.134488 | 1.313949 |
| PCDH7    | 0.393608 | 1.653881 | 1.782094 | 1.313675 |
| SLC1A5   | 0.393445 | 0.240151 | 2.9892   | 1.313526 |
| PYGB     | 0.393125 | 0.490551 | 3.215904 | 1.313235 |
| GSDMB    | 0.392446 | 2.543922 | 1.762194 | 1.312617 |
| PPAPDC1A | 0.39243  | 2.52755  | 1.368095 | 1.312602 |
| ENTHD1   | 0.392331 | 1.213472 | 1.543029 | 1.312512 |
| C5orf23  | 0.39219  | 1.393907 | 1.682333 | 1.312384 |
| MYH16    | 0.391801 | 2.48973  | 1.319125 | 1.31203  |
| CHST4    | 0.391676 | 6.004372 | 1.16035  | 1.311917 |
| ODAM     | 0.390676 | 4.014442 | 1.083074 | 1.311008 |
| MATN4    | 0.390261 | 0.570795 | 1.661144 | 1.310631 |
| F11R     | 0.390236 | 0.764032 | 3.514339 | 1.310607 |
| DNAH2    | 0.390087 | 2.422751 | 1.525794 | 1.310473 |
| C1orf210 | 0.389939 | 2.083703 | 2.577151 | 1.310338 |
| MTNR1A   | 0.389939 | 0.968685 | 1.899827 | 1.310338 |
| DQX1     | 0.389678 | 1.826103 | 1.024382 | 1.310101 |
| SUCNR1   | 0.389364 | 0.854051 | 1.37059  | 1.309816 |
| LRRC66   | 0.389271 | 3.53296  | 1.52437  | 1.309731 |

|            |          |          |          |          |
|------------|----------|----------|----------|----------|
| CHDH       | 0.388346 | 1.192914 | 2.77791  | 1.308892 |
| CORO2A     | 0.388203 | 1.552676 | 2.14629  | 1.308762 |
| SLC35F5    | 0.38791  | 0.089027 | 5.246326 | 1.308496 |
| EPHA7      | 0.387146 | -0.35689 | 1.208419 | 1.307803 |
| NLN        | 0.387059 | -0.43822 | 3.532119 | 1.307725 |
| ETV4       | 0.386934 | 1.610399 | 2.176716 | 1.307611 |
| TREM1      | 0.386548 | 1.783965 | 1.459808 | 1.307262 |
| CTNND1     | 0.386546 | 0.394492 | 4.703836 | 1.30726  |
| HIST1H2AG  | 0.386477 | -0.63722 | 2.394299 | 1.307197 |
| HOXA11AS   | 0.386032 | -0.48769 | 1.250584 | 1.306794 |
| IGFL3      | 0.386003 | 1.14108  | 1.449154 | 1.306768 |
| SLC26A3    | 0.385493 | 0.394264 | 0.967062 | 1.306306 |
| CAPN5      | 0.385362 | 2.092468 | 2.076639 | 1.306188 |
| LDHA       | 0.38536  | 0.077059 | 2.998534 | 1.306186 |
| KIAA1161   | 0.385198 | 0.755718 | 2.639599 | 1.306039 |
| HIST1H1C   | 0.38494  | 0.121872 | 2.112475 | 1.305805 |
| YES1       | 0.3846   | 0.101741 | 5.342865 | 1.305498 |
| ANKRD36BP1 | 0.384582 | -0.10793 | 1.923493 | 1.305481 |
| ANG        | 0.384374 | 1.570096 | 2.358001 | 1.305293 |
| TRIM44     | 0.384249 | -0.04574 | 3.846499 | 1.30518  |
| MMP8       | 0.384152 | 0.845237 | 1.514938 | 1.305093 |
| SPIN4      | 0.383658 | 0.18485  | 3.21499  | 1.304646 |
| CDH11      | 0.383222 | 1.833734 | 1.708971 | 1.304251 |
| ATP2C2     | 0.383146 | 2.285003 | 1.781702 | 1.304183 |
| MFSD9      | 0.383062 | 0.249491 | 4.705325 | 1.304107 |
| TTC22      | 0.382804 | 1.910479 | 2.679772 | 1.303874 |
| PLBD1      | 0.38247  | 2.044929 | 1.848995 | 1.303572 |
| ABCC13     | 0.382068 | -0.22352 | 2.20629  | 1.303209 |
| PAFAH1B2   | 0.382003 | 0.010061 | 3.234056 | 1.30315  |
| MAML2      | 0.381765 | 0.531612 | 2.525198 | 1.302935 |
| KIAA1244   | 0.380972 | 1.136268 | 1.917316 | 1.302219 |
| SMYD1      | 0.380917 | -0.32998 | 1.434102 | 1.302169 |
| PDE11A     | 0.380253 | 2.038757 | 2.028344 | 1.30157  |
| NOX1       | 0.380201 | 1.380694 | 1.038375 | 1.301523 |
| CYP2J2     | 0.379441 | 0.545844 | 2.164336 | 1.300838 |
| C11orf90   | 0.379259 | 1.206221 | 2.119387 | 1.300674 |
| KRT19      | 0.379215 | 3.973703 | 1.392059 | 1.300634 |

---



**Table S3.** Top 1000 significantly down-regulated DEGs in high versus low-risk PDAC patients in TCGA dataset

| <b>Gene symbol</b> | <b>logFC</b> | <b>AveExpr</b> | <b>t</b> | <b>Fold Change (FC)</b> |
|--------------------|--------------|----------------|----------|-------------------------|
| AGAP6              | -0.82896     | 0.298031       | -7.28266 | 0.562933                |
| ZNF789             | -0.73484     | 0.185556       | -7.25867 | 0.600886                |
| CHKB-CPT1B         | -0.97932     | 0.444076       | -6.95515 | 0.507217                |
| LOC100130557       | -0.79092     | -0.01894       | -6.87096 | 0.577976                |
| ? 155060           | -0.74192     | 0.087002       | -6.88417 | 0.597945                |
| LOC100129387       | -0.65593     | -0.33968       | -6.90581 | 0.634664                |
| TDRD10             | -1.00335     | -0.1307        | -6.82133 | 0.498841                |
| ANKRD23            | -0.70175     | 0.175058       | -6.8109  | 0.614825                |
| KCNIP2             | -1.16445     | 0.069399       | -6.74413 | 0.446134                |
| FAM13AOS           | -0.83475     | 0.693129       | -6.75041 | 0.560679                |
| LOC100128288       | -0.78869     | -0.08332       | -6.73324 | 0.578869                |
| TRPV1              | -0.74996     | -0.20077       | -6.73033 | 0.594619                |
| NPFF               | -0.98305     | 0.636419       | -6.64283 | 0.505909                |
| MYH3               | -0.93248     | -0.05713       | -6.63969 | 0.523957                |
| CAPN3              | -0.92034     | -0.24453       | -6.54769 | 0.528384                |
| SSPO               | -1.33802     | -0.23303       | -6.52886 | 0.395564                |
| REC8               | -1.1813      | 0.599561       | -6.51718 | 0.440953                |
| C17orf86           | -0.63963     | -0.22703       | -6.49203 | 0.641876                |
| ZNF767             | -0.62923     | 0.179294       | -6.49339 | 0.64652                 |
| AGER               | -0.95471     | -0.29094       | -6.44271 | 0.515946                |
| EGFL8              | -0.94211     | 0.482507       | -6.43974 | 0.52047                 |
| LOC221442          | -0.97101     | 0.338736       | -6.38557 | 0.510149                |
| LOC338799          | -0.93198     | 0.158939       | -6.37134 | 0.524138                |
| C9orf45            | -0.91522     | -0.52864       | -6.39088 | 0.530264                |
| GABBR1             | -0.8246      | 0.414914       | -6.37382 | 0.564638                |
| LOC390595          | -0.82391     | -0.14762       | -6.4095  | 0.56491                 |
| LOC91316           | -0.79584     | 0.194536       | -6.39629 | 0.576006                |
| FAM179A            | -1.28586     | 1.202948       | -6.34731 | 0.410126                |
| CDK3               | -0.79248     | 0.156282       | -6.33814 | 0.577351                |
| LY6G5B             | -0.77118     | 0.15492        | -6.31865 | 0.585938                |
| SGSM2              | -0.67129     | -0.1488        | -6.31526 | 0.627944                |
| IL11RA             | -0.65432     | -0.19443       | -6.31477 | 0.635375                |
| HERC2P2            | -0.94287     | 0.221057       | -6.28724 | 0.520198                |
| PLGLB2             | -0.83256     | 0.016386       | -6.28559 | 0.56153                 |
| NPPA               | -0.8098      | -0.12176       | -6.27495 | 0.570461                |
| CELF6              | -1.04335     | 0.384394       | -6.27008 | 0.4852                  |
| KIAA0895L          | -0.66868     | 0.178569       | -6.26522 | 0.629082                |
| NCRNA00202         | -0.88218     | -0.48453       | -6.22672 | 0.542547                |
| SEC31B             | -1.02138     | 0.244576       | -6.21517 | 0.492644                |
| TCTE3              | -0.64803     | 0.127002       | -6.21777 | 0.638152                |
| PPIEL              | -0.93456     | -0.04495       | -6.19391 | 0.523202                |
| ACRC               | -0.70467     | 0.193424       | -6.19046 | 0.613584                |
| UCP3               | -0.6953      | -0.30983       | -6.19271 | 0.617582                |

|              |          |          |          |          |
|--------------|----------|----------|----------|----------|
| ZGLP1        | -0.91233 | -0.04383 | -6.18171 | 0.531325 |
| AGAP4        | -0.67352 | 0.381433 | -6.18156 | 0.626976 |
| TTLL3        | -0.74404 | 0.620898 | -6.16893 | 0.597066 |
| FAM186A      | -0.78792 | 0.004904 | -6.14577 | 0.579178 |
| DFNB59       | -0.67241 | 0.225408 | -6.13527 | 0.627457 |
| CATSPER2     | -0.74384 | 0.430986 | -6.12411 | 0.59715  |
| PNMA3        | -1.37686 | -0.58005 | -6.07871 | 0.385056 |
| C3orf47      | -0.80324 | -0.12361 | -6.07697 | 0.57306  |
| PILRB        | -0.85615 | 0.108331 | -6.0538  | 0.552426 |
| NCRNA00174   | -0.7598  | -0.13386 | -6.05093 | 0.590577 |
| LOC728392    | -1.16608 | 1.24698  | -6.03614 | 0.44563  |
| NFKBID       | -0.81243 | 0.437924 | -6.03209 | 0.569423 |
| C6orf81      | -0.92714 | -0.32326 | -5.99973 | 0.5259   |
| LOC286367    | -0.7     | 0.306923 | -5.99236 | 0.615572 |
| LOC100132287 | -0.74537 | 0.200077 | -5.97021 | 0.596515 |
| COLQ         | -0.72821 | 0.284038 | -5.9664  | 0.603654 |
| LOC168474    | -0.83265 | -0.49101 | -5.95969 | 0.561498 |
| EGFL7        | -0.86763 | 0.242738 | -5.92304 | 0.548045 |
| NPIPL3       | -0.87565 | 0.415212 | -5.8822  | 0.545007 |
| CROCCL2      | -0.64998 | 0.264692 | -5.8741  | 0.637291 |
| RLTPR        | -1.28929 | 0.516076 | -5.86797 | 0.409153 |
| CYP2D7P1     | -1.07414 | 0.192393 | -5.8616  | 0.474955 |
| MTMR9L       | -0.70447 | 0.93583  | -5.85496 | 0.613666 |
| GOLGA8A      | -0.93225 | 0.354871 | -5.81267 | 0.52404  |
| KIAA1683     | -0.9016  | 0.004983 | -5.80431 | 0.535292 |
| PROCA1       | -0.63232 | 0.26235  | -5.78439 | 0.645138 |
| DNHD1        | -0.71984 | 0.077745 | -5.76504 | 0.607164 |
| ZMAT1        | -0.94556 | 0.20096  | -5.75267 | 0.519228 |
| CSAD         | -0.73857 | -0.19516 | -5.75356 | 0.599331 |
| PRRT1        | -0.73185 | 0.076506 | -5.74567 | 0.602131 |
| LTB4R        | -0.6892  | -0.04121 | -5.74299 | 0.620197 |
| ZCCHC18      | -1.03571 | 0.939406 | -5.72513 | 0.487775 |
| ATG16L2      | -0.68445 | 0.39021  | -5.72598 | 0.622242 |
| CRYGS        | -0.81109 | 0.506134 | -5.6911  | 0.56995  |
| C19orf76     | -0.85901 | 0.497706 | -5.66727 | 0.551331 |
| CPT1B        | -0.93174 | 0.288227 | -5.66007 | 0.524226 |
| WNT10B       | -1.00895 | 0.198374 | -5.6494  | 0.496907 |
| ZNF540       | -0.87997 | 0.141268 | -5.64884 | 0.54338  |
| SNHG10       | -0.66304 | 0.112092 | -5.64692 | 0.631544 |
| ENO3         | -0.73739 | -0.80463 | -5.63817 | 0.599825 |
| TMEM151B     | -0.87993 | -0.0227  | -5.62799 | 0.543395 |
| C7orf51      | -1.0675  | 1.457896 | -5.61418 | 0.477145 |
| SGK494       | -0.64735 | -0.30701 | -5.61416 | 0.638454 |
| CCR10        | -0.90416 | 0.184724 | -5.58995 | 0.534345 |
| KANK3        | -0.75536 | 0.220713 | -5.58897 | 0.592398 |
| MAPK11       | -0.7034  | 0.253619 | -5.5888  | 0.614124 |

|              |          |          |          |          |
|--------------|----------|----------|----------|----------|
| RFPL3S       | -0.74321 | 0.072657 | -5.58745 | 0.59741  |
| PGAM2        | -0.77087 | -0.51182 | -5.58052 | 0.586065 |
| KIAA1875     | -1.05131 | 0.068222 | -5.54887 | 0.48253  |
| LRRC37A3     | -0.71393 | -0.3328  | -5.53316 | 0.609656 |
| SH2D3C       | -0.69606 | 0.129933 | -5.5333  | 0.617255 |
| C10orf68     | -0.69805 | 0.51434  | -5.52024 | 0.616404 |
| H2BFXP       | -0.78065 | 0.53864  | -5.508   | 0.582105 |
| SLC25A18     | -0.7661  | -0.80586 | -5.50525 | 0.588005 |
| ADCY4        | -0.7012  | 1.093276 | -5.4539  | 0.615059 |
| DPY19L2      | -1.08944 | 0.14723  | -5.44441 | 0.469943 |
| LOC100133331 | -0.65827 | 0.190559 | -5.44356 | 0.633636 |
| LOC349114    | -0.68108 | 0.26264  | -5.42822 | 0.623696 |
| LPAL2        | -0.71128 | 0.149274 | -5.41393 | 0.610777 |
| ARHGAP33     | -0.6868  | -0.22453 | -5.40952 | 0.621231 |
| CHRNA10      | -0.69472 | 0.006875 | -5.40445 | 0.61783  |
| LCNL1        | -0.92375 | 0.566363 | -5.40138 | 0.527139 |
| GHRLOS       | -0.6436  | 0.010211 | -5.3611  | 0.640114 |
| C16orf79     | -1.03091 | 0.261435 | -5.35363 | 0.489403 |
| C20orf160    | -0.70756 | 0.240226 | -5.35206 | 0.612356 |
| PABPC1L      | -0.91789 | 0.304028 | -5.34715 | 0.529281 |
| SLC12A1      | -0.84771 | -0.76061 | -5.34729 | 0.555665 |
| AGAP7        | -0.77148 | -0.06153 | -5.3404  | 0.585815 |
| SCNN1D       | -0.99253 | -0.02264 | -5.33048 | 0.502596 |
| LOC100129726 | -0.68827 | -0.03654 | -5.31419 | 0.620599 |
| A1BG         | -0.79169 | -0.30465 | -5.30196 | 0.577666 |
| VENTX        | -0.80795 | 0.934427 | -5.2853  | 0.571193 |
| L3MBTL       | -0.73432 | 0.241636 | -5.27407 | 0.601101 |
| CCDC17       | -0.76524 | 0.066193 | -5.27309 | 0.588357 |
| ACCN3        | -1.0122  | 0.203273 | -5.26404 | 0.495789 |
| CYP21A2      | -1.04596 | 0.037575 | -5.2605  | 0.484323 |
| ZNF692       | -0.65679 | -0.11269 | -5.25174 | 0.63429  |
| FGF17        | -1.05251 | 0.226014 | -5.24962 | 0.482129 |
| PLAC9        | -0.97309 | 1.218229 | -5.24135 | 0.509413 |
| NTN5         | -0.77089 | -0.1068  | -5.24053 | 0.586055 |
| EID2B        | -0.66131 | -0.03554 | -5.24085 | 0.632302 |
| C6orf163     | -0.68893 | -0.31049 | -5.23497 | 0.620314 |
| GOLGA8B      | -0.98911 | 0.359257 | -5.22237 | 0.50379  |
| FBXO41       | -0.70056 | 0.307576 | -5.21805 | 0.615331 |
| SLC25A27     | -0.91321 | 0.300753 | -5.20842 | 0.531001 |
| C21orf58     | -0.85182 | 0.033213 | -5.20888 | 0.554085 |
| RELL2        | -0.65374 | 0.105157 | -5.19161 | 0.635632 |
| KLRA1        | -0.7708  | 0.328678 | -5.18873 | 0.586093 |
| LOC100216545 | -0.65223 | 0.081466 | -5.18407 | 0.636297 |
| NOVA1        | -1.21317 | -0.26208 | -5.17294 | 0.431321 |
| RAMP2        | -0.65258 | 0.290991 | -5.14088 | 0.63614  |
| SNHG3        | -0.63251 | 0.14486  | -5.13879 | 0.645051 |

|              |          |          |          |          |
|--------------|----------|----------|----------|----------|
| FAM18A       | -0.649   | 0.206388 | -5.13732 | 0.637721 |
| HFM1         | -1.00247 | -0.15457 | -5.13307 | 0.499144 |
| RASL10A      | -0.71144 | -0.22605 | -5.13313 | 0.61071  |
| SOX18        | -0.76987 | 0.150212 | -5.13204 | 0.58647  |
| MEG3         | -1.05812 | 2.683388 | -5.12147 | 0.480259 |
| VN1R1        | -0.63385 | 0.075992 | -5.10645 | 0.644454 |
| SOX17        | -0.74993 | 0.198948 | -5.10015 | 0.594633 |
| GRASP        | -0.66536 | 0.887768 | -5.09605 | 0.630533 |
| TMEM86B      | -0.73539 | 0.535441 | -5.09205 | 0.600656 |
| NCRNA00107   | -0.73102 | 0.137444 | -5.08267 | 0.602479 |
| CPLX3        | -0.64213 | -0.93319 | -5.08122 | 0.640767 |
| HRC          | -0.63588 | -0.10412 | -5.06599 | 0.643547 |
| C1QTNF4      | -1.03259 | 0.306061 | -5.06394 | 0.488831 |
| NEIL1        | -0.73945 | 0.551086 | -5.05606 | 0.598967 |
| MZF1         | -0.67645 | 0.213541 | -5.05633 | 0.625702 |
| HPX          | -0.98827 | -0.298   | -5.05197 | 0.504082 |
| KCNAB3       | -0.75993 | 0.350168 | -5.05239 | 0.590524 |
| CNIH2        | -1.29615 | 0.727154 | -5.04905 | 0.407212 |
| ROBO3        | -0.67962 | 0.624719 | -5.04441 | 0.624331 |
| ASPDH        | -1.33617 | 0.413998 | -5.04278 | 0.39607  |
| C6orf26      | -0.74934 | 0.643272 | -5.03737 | 0.594877 |
| LOC100131434 | -0.81697 | 0.528389 | -5.03408 | 0.567634 |
| LOC100270804 | -0.67253 | 0.110494 | -5.03119 | 0.627404 |
| AHSA2        | -0.71427 | 0.545225 | -4.99969 | 0.609512 |
| KCNT1        | -0.75255 | 0.140222 | -4.98866 | 0.593554 |
| BZRAP1       | -0.82123 | -0.02502 | -4.98221 | 0.56596  |
| l-Sep        | -0.94269 | 0.218755 | -4.98058 | 0.520262 |
| YJEFN3       | -0.95086 | -0.06651 | -4.9782  | 0.517325 |
| C2orf58      | -0.64441 | 0.486096 | -4.97759 | 0.639753 |
| NSUN5P1      | -0.82754 | 0.217622 | -4.97418 | 0.563491 |
| GPR162       | -0.79465 | 0.495687 | -4.97414 | 0.576482 |
| PPP1R3F      | -0.64513 | -0.04433 | -4.97049 | 0.639434 |
| PHF21B       | -1.16121 | 0.100781 | -4.96642 | 0.447139 |
| C14orf139    | -0.76519 | 0.10946  | -4.96678 | 0.588375 |
| C21orf29     | -1.15351 | 0.580181 | -4.96076 | 0.449531 |
| PDZD4        | -0.88911 | 0.796618 | -4.96022 | 0.539947 |
| LOC100133161 | -0.80398 | 0.432161 | -4.94844 | 0.572766 |
| PVRIG        | -0.79014 | 0.365873 | -4.94874 | 0.578287 |
| SYT2         | -0.70484 | -0.45037 | -4.94858 | 0.613511 |
| SOAT2        | -0.79754 | 0.274814 | -4.94554 | 0.575327 |
| C3orf35      | -0.6809  | 0.5295   | -4.94436 | 0.623777 |
| C6orf174     | -0.94577 | 0.689085 | -4.93976 | 0.519151 |
| C1orf220     | -0.71636 | 0.611904 | -4.9394  | 0.60863  |
| STAR         | -0.93488 | -0.47655 | -4.93129 | 0.523086 |
| FAM69B       | -0.73349 | -0.61211 | -4.92839 | 0.601445 |
| LRDD         | -0.66682 | -0.2453  | -4.92258 | 0.629896 |

|           |          |          |          |          |
|-----------|----------|----------|----------|----------|
| USHBP1    | -0.71591 | 0.40427  | -4.90916 | 0.608819 |
| FBLL1     | -1.25276 | 0.776641 | -4.9005  | 0.419646 |
| LOC401431 | -0.85748 | -0.26895 | -4.89734 | 0.551914 |
| NRN1L     | -0.81904 | -0.00554 | -4.88583 | 0.566819 |
| LOC730668 | -0.63633 | 0.250867 | -4.8855  | 0.643348 |
| LENG8     | -0.62538 | 0.642735 | -4.88366 | 0.648248 |
| LRRC39    | -0.74992 | -0.22738 | -4.87975 | 0.594637 |
| NSUN5P2   | -0.77457 | 0.207177 | -4.87338 | 0.584561 |
| LOC149134 | -0.7434  | -0.31288 | -4.85751 | 0.597331 |
| CPNE9     | -0.81548 | 0.477719 | -4.8559  | 0.568219 |
| MEF2B     | -0.89972 | 0.152682 | -4.85298 | 0.53599  |
| TAL1      | -0.68805 | 0.289638 | -4.84993 | 0.620692 |
| C5orf27   | -0.74484 | -0.07    | -4.83171 | 0.596733 |
| FAM71F2   | -0.74994 | 0.325315 | -4.82995 | 0.594628 |
| PLA2G6    | -0.62369 | -0.14163 | -4.81818 | 0.649009 |
| FOXD4L1   | -0.71116 | 0.077815 | -4.81628 | 0.610829 |
| LOC219347 | -0.68013 | -1.02831 | -4.80955 | 0.624108 |
| C1orf228  | -0.81643 | 0.090574 | -4.80211 | 0.567847 |
| IGLL3     | -0.8073  | 0.656543 | -4.80236 | 0.571451 |
| CLDN5     | -0.72437 | 0.898831 | -4.79047 | 0.60526  |
| FLJ45244  | -0.65998 | 0.104677 | -4.78351 | 0.632888 |
| ZFR2      | -1.0468  | 0.155328 | -4.7781  | 0.48404  |
| FAM43B    | -0.78658 | 1.57812  | -4.77152 | 0.579719 |
| FAM95B1   | -0.8629  | 0.762288 | -4.76885 | 0.549846 |
| LAT       | -0.73221 | 0.381866 | -4.7505  | 0.60198  |
| GNB3      | -0.7402  | 0.787766 | -4.7441  | 0.598658 |
| JAKMIP1   | -1.12379 | 0.273021 | -4.74189 | 0.458885 |
| MAPK12    | -0.6867  | -0.25889 | -4.73879 | 0.621275 |
| MUSTN1    | -0.92455 | 0.53432  | -4.73427 | 0.526846 |
| EML6      | -0.81884 | -0.30485 | -4.73255 | 0.566898 |
| RASA4     | -0.65494 | 0.502037 | -4.72234 | 0.635101 |
| LRRC16B   | -0.98183 | 0.212891 | -4.71796 | 0.506336 |
| ANKLE1    | -0.69328 | -0.76922 | -4.71754 | 0.618448 |
| LOC338758 | -0.66577 | -0.07723 | -4.71438 | 0.63035  |
| TDRD6     | -0.776   | 0.081256 | -4.71332 | 0.583985 |
| DNAH1     | -0.62774 | 0.543585 | -4.70477 | 0.647189 |
| TNFRSF25  | -0.82167 | 0.429895 | -4.69432 | 0.565788 |
| P2RX2     | -0.93279 | 0.326174 | -4.69335 | 0.523845 |
| REM2      | -0.72562 | 0.566841 | -4.68321 | 0.604737 |
| LRRC4B    | -1.00962 | -0.1119  | -4.67967 | 0.496678 |
| CEACAM19  | -0.76854 | 0.734272 | -4.67315 | 0.587011 |
| DLGAP3    | -0.98519 | 0.155061 | -4.66806 | 0.50516  |
| PTH1R     | -0.67248 | 0.571739 | -4.66533 | 0.627427 |
| HSD17B3   | -0.98253 | 0.230104 | -4.66173 | 0.506092 |
| LYL1      | -0.68023 | 0.412031 | -4.66215 | 0.624067 |
| RASAL3    | -0.79478 | 0.441742 | -4.63646 | 0.576429 |

|              |          |          |          |          |
|--------------|----------|----------|----------|----------|
| ARRDC5       | -0.72905 | 0.618126 | -4.63311 | 0.603302 |
| CACNA1A      | -1.20016 | 1.90498  | -4.62933 | 0.435227 |
| HSD17B14     | -0.72889 | -0.20441 | -4.6124  | 0.603366 |
| C9orf139     | -0.691   | 0.25511  | -4.60678 | 0.619424 |
| SPTBN5       | -0.94163 | 1.075522 | -4.59688 | 0.520644 |
| VWCE         | -0.68963 | -1.16068 | -4.59425 | 0.620014 |
| ARHGAP4      | -0.79876 | 0.17388  | -4.59321 | 0.574842 |
| LOC100190938 | -0.71764 | -0.83486 | -4.58396 | 0.608091 |
| LRRC24       | -1.18129 | -0.39089 | -4.57712 | 0.440956 |
| LOC644165    | -0.73276 | 0.197166 | -4.56467 | 0.601752 |
| ARHGEF15     | -0.63734 | 0.544121 | -4.55603 | 0.642899 |
| GNRH1        | -0.63663 | 0.905035 | -4.54967 | 0.643212 |
| LOC100240726 | -0.72713 | 0.367596 | -4.53866 | 0.604106 |
| GPX3         | -0.95863 | -0.40464 | -4.53574 | 0.514546 |
| LYG1         | -0.66665 | -0.08442 | -4.52972 | 0.629969 |
| STAT4        | -0.80199 | 0.81231  | -4.52547 | 0.573557 |
| SPEG         | -0.96548 | 0.592612 | -4.52395 | 0.512108 |
| FXYD7        | -0.836   | -0.16377 | -4.51649 | 0.560194 |
| SCRT1        | -1.13678 | 0.935742 | -4.51394 | 0.454774 |
| RAMP3        | -0.64503 | 0.7686   | -4.51181 | 0.639478 |
| RASGRP2      | -1.05891 | 0.625865 | -4.49851 | 0.479995 |
| NCRNA00173   | -0.77528 | -1.46306 | -4.49879 | 0.584277 |
| TSPAN32      | -0.82652 | 0.314082 | -4.49574 | 0.563886 |
| GDAP1L1      | -1.22031 | 0.898765 | -4.49419 | 0.429191 |
| TSPAN7       | -1.00923 | -0.23006 | -4.49132 | 0.49681  |
| SPTBN4       | -1.12094 | 0.598114 | -4.49025 | 0.459793 |
| C21orf15     | -0.89041 | -0.05557 | -4.48967 | 0.539462 |
| NCRNA00181   | -0.69677 | -0.23625 | -4.48771 | 0.616952 |
| TCAP         | -0.80075 | -0.28759 | -4.4846  | 0.574049 |
| SLC12A5      | -1.13925 | 0.30603  | -4.48341 | 0.453996 |
| ATP1B2       | -0.83114 | -0.36622 | -4.48097 | 0.562085 |
| CES8         | -0.7468  | 0.115851 | -4.47835 | 0.595924 |
| FXYD1        | -0.89616 | 0.985664 | -4.47754 | 0.537315 |
| MGC16703     | -0.79763 | 0.284721 | -4.47383 | 0.575293 |
| C19orf18     | -0.69519 | 0.116759 | -4.46833 | 0.617627 |
| ICA1L        | -0.65087 | -0.02746 | -4.46825 | 0.636898 |
| CXorf50B     | -0.62511 | 0.562119 | -4.4641  | 0.648372 |
| MCART6       | -0.94047 | 0.644986 | -4.46329 | 0.521062 |
| RUNDC3A      | -1.41069 | 1.213283 | -4.45277 | 0.376132 |
| NGFR         | -1.18675 | 1.124355 | -4.45178 | 0.439292 |
| TTC23L       | -0.68614 | -0.49393 | -4.44133 | 0.621516 |
| DGCR9        | -0.86573 | 0.081002 | -4.44056 | 0.54877  |
| MIR17HG      | -0.69539 | 0.386633 | -4.43975 | 0.617544 |
| C2orf85      | -0.82941 | -0.11655 | -4.43818 | 0.562759 |
| SCN4A        | -0.87729 | -0.79097 | -4.43598 | 0.544388 |
| STMN3        | -0.68296 | 0.259871 | -4.43395 | 0.622887 |

|            |          |          |          |          |
|------------|----------|----------|----------|----------|
| MIAT       | -0.90999 | 0.626472 | -4.43159 | 0.532188 |
| LINGO3     | -1.03561 | 0.050626 | -4.42807 | 0.487811 |
| TSNAXIP1   | -0.63916 | 0.384096 | -4.42697 | 0.642087 |
| C19orf35   | -0.74599 | 0.538443 | -4.41685 | 0.59626  |
| PCSK1N     | -1.61595 | 2.74651  | -4.41351 | 0.32625  |
| OR13A1     | -0.81646 | 0.681991 | -4.41123 | 0.567835 |
| ATOH8      | -0.72192 | -0.4024  | -4.40601 | 0.606291 |
| TREML1     | -0.75002 | 0.335073 | -4.40429 | 0.594595 |
| UPB1       | -0.78545 | -0.51218 | -4.40329 | 0.58017  |
| CRB2       | -0.81138 | -1.54987 | -4.39088 | 0.569837 |
| GOLGA2B    | -0.66411 | -0.0948  | -4.38559 | 0.631077 |
| KRT72      | -0.71128 | 0.08661  | -4.38417 | 0.610777 |
| KCNK17     | -1.05414 | 2.202967 | -4.37633 | 0.481583 |
| MTMR7      | -0.76849 | 0.053233 | -4.37424 | 0.58703  |
| CPLX1      | -0.77452 | 0.327534 | -4.36158 | 0.584584 |
| SNAP91     | -1.19574 | 2.178211 | -4.36122 | 0.436563 |
| SLC22A17   | -0.84199 | 0.548745 | -4.35866 | 0.557872 |
| SLC6A13    | -0.7189  | -2.06864 | -4.35348 | 0.607562 |
| NCRNA00105 | -0.84188 | 0.441869 | -4.3524  | 0.557917 |
| FAM107A    | -0.88566 | -0.07421 | -4.35157 | 0.541242 |
| 5-Sep      | -0.62692 | -0.05185 | -4.35108 | 0.647559 |
| TRPM6      | -0.90265 | -0.19776 | -4.34456 | 0.534904 |
| LCN10      | -1.10551 | 0.887654 | -4.34237 | 0.464739 |
| BRSK1      | -0.71599 | 0.31733  | -4.34231 | 0.608788 |
| C5orf39    | -0.62755 | 0.322548 | -4.33062 | 0.647275 |
| MSTN       | -0.69411 | -0.26222 | -4.32951 | 0.618091 |
| GCGR       | -1.17913 | 1.604325 | -4.32832 | 0.441617 |
| MGC42105   | -0.83504 | 0.269354 | -4.3277  | 0.560568 |
| GIMAP1     | -0.63549 | 0.415052 | -4.32691 | 0.643721 |
| CCDC78     | -0.85853 | 0.168821 | -4.32515 | 0.551514 |
| FOXD4      | -0.74798 | -0.21322 | -4.32335 | 0.595435 |
| B3GAT1     | -1.08134 | -0.98425 | -4.3151  | 0.472588 |
| NLRP9      | -0.83107 | 0.745666 | -4.31525 | 0.562112 |
| PIPOX      | -0.89552 | -0.2739  | -4.30949 | 0.537553 |
| CA3        | -0.85418 | 0.870934 | -4.30441 | 0.553181 |
| LIMD2      | -0.6952  | 0.104942 | -4.30125 | 0.617623 |
| HCG27      | -0.62676 | 0.620081 | -4.29912 | 0.647627 |
| GNG7       | -0.8002  | 0.094035 | -4.29506 | 0.574271 |
| CHST8      | -1.07422 | 0.853187 | -4.29268 | 0.474928 |
| GRRP1      | -0.76719 | 0.909192 | -4.2856  | 0.587561 |
| GRIN2C     | -0.70343 | -1.13739 | -4.28441 | 0.614112 |
| SHISA7     | -1.20015 | 0.433501 | -4.27692 | 0.435229 |
| BCAM       | -0.70037 | -0.50193 | -4.27348 | 0.615413 |
| C15orf59   | -0.74732 | 0.375369 | -4.27179 | 0.595709 |
| RBP5       | -0.79864 | 0.32128  | -4.2705  | 0.57489  |
| CACNA1I    | -1.00581 | 0.270547 | -4.26811 | 0.49799  |

|              |          |          |          |          |
|--------------|----------|----------|----------|----------|
| ZAP70        | -0.96591 | 0.529352 | -4.25644 | 0.511954 |
| CDH12        | -0.84475 | -0.08251 | -4.24562 | 0.556809 |
| HSF4         | -0.82418 | 0.326862 | -4.23797 | 0.564802 |
| ZNF781       | -0.67989 | 0.220049 | -4.2336  | 0.624212 |
| GIMAP5       | -0.70773 | 0.195711 | -4.2326  | 0.612281 |
| GPIHBP1      | -0.74188 | 0.020695 | -4.2204  | 0.597959 |
| DHH          | -0.76782 | 0.86177  | -4.21792 | 0.587304 |
| SUSD4        | -0.91414 | 0.85555  | -4.21389 | 0.530661 |
| CNTNAP4      | -0.79623 | -0.55616 | -4.21319 | 0.575852 |
| MPZ          | -0.73816 | 0.20845  | -4.21447 | 0.599503 |
| ITGA7        | -0.67354 | 0.224605 | -4.21245 | 0.626967 |
| C5orf38      | -1.25479 | -1.04851 | -4.21157 | 0.419054 |
| LGI4         | -0.72077 | 0.536774 | -4.20562 | 0.606774 |
| FAM19A1      | -0.6311  | -0.09259 | -4.20585 | 0.645682 |
| LBP          | -1.55231 | 0.365659 | -4.20389 | 0.340964 |
| NCRNA00176   | -0.69173 | -0.14096 | -4.19843 | 0.619111 |
| ATP6V1G2     | -0.65358 | -0.26226 | -4.19248 | 0.635702 |
| LIPE         | -0.67918 | 0.128638 | -4.19216 | 0.624519 |
| CCDC154      | -0.78843 | -0.25975 | -4.19017 | 0.578975 |
| CRIP3        | -0.90834 | 0.177319 | -4.18948 | 0.532797 |
| PTPRCAP      | -0.90679 | 0.35269  | -4.18969 | 0.533371 |
| NPR1         | -0.65288 | 0.322057 | -4.18934 | 0.636009 |
| LOC283663    | -1.00294 | 1.221775 | -4.18554 | 0.498982 |
| DUSP15       | -0.75698 | -0.4047  | -4.18091 | 0.591736 |
| LTC4S        | -0.81119 | 0.493599 | -4.18056 | 0.569912 |
| CYP2D6       | -0.83444 | 0.200295 | -4.17729 | 0.5608   |
| SCML4        | -0.87789 | 1.058395 | -4.17692 | 0.544164 |
| CFP          | -0.8781  | 0.547308 | -4.17399 | 0.544085 |
| SERPINF2     | -0.73442 | 0.07589  | -4.1735  | 0.601058 |
| RIC3         | -1.12189 | 0.43932  | -4.16862 | 0.459493 |
| PCDHA2       | -0.74951 | 0.267103 | -4.16539 | 0.594806 |
| TRIM46       | -0.67347 | 0.682062 | -4.16353 | 0.626998 |
| MST1         | -0.63238 | -0.38229 | -4.15792 | 0.645112 |
| OLFM2        | -0.67379 | -0.23358 | -4.154   | 0.626859 |
| CERKL        | -0.64199 | 0.740591 | -4.15288 | 0.64083  |
| DDX25        | -1.18896 | 0.370997 | -4.15085 | 0.43862  |
| CPT1C        | -0.62457 | 1.491962 | -4.14924 | 0.648611 |
| FNDC5        | -0.68567 | -0.46767 | -4.14808 | 0.621716 |
| C4orf44      | -0.64875 | 0.278908 | -4.14326 | 0.637833 |
| CARD9        | -0.72092 | 0.264277 | -4.14102 | 0.606709 |
| CLEC3B       | -0.74453 | 0.163774 | -4.12986 | 0.596862 |
| MGC16121     | -0.66759 | 0.339392 | -4.12849 | 0.629558 |
| LOC100272228 | -0.66915 | 0.33363  | -4.12486 | 0.628877 |
| CRMP1        | -0.82782 | 0.642419 | -4.12174 | 0.56338  |
| KNDC1        | -1.10325 | 0.694046 | -4.11761 | 0.465466 |
| HCST         | -0.63682 | 0.282258 | -4.11536 | 0.643128 |



|          |          |          |          |          |
|----------|----------|----------|----------|----------|
| GDF1     | -1.00241 | -0.73937 | -4.10863 | 0.499164 |
| SCN3B    | -0.95156 | 0.936643 | -4.11002 | 0.517074 |
| ITGAD    | -0.85386 | -0.23482 | -4.10773 | 0.553304 |
| ANKK1    | -0.76703 | 0.198582 | -4.1041  | 0.587624 |
| DMRTC1B  | -1.0823  | 1.035335 | -4.09733 | 0.472276 |
| UCHL1    | -0.76562 | 0.861261 | -4.0963  | 0.588199 |
| ZNF467   | -0.67419 | -0.00847 | -4.09648 | 0.626683 |
| SFRS13B  | -0.6685  | -0.02129 | -4.09467 | 0.629159 |
| CYFIP2   | -0.64427 | -0.57844 | -4.09353 | 0.639818 |
| VWA5B2   | -1.54047 | 2.484647 | -4.09055 | 0.343772 |
| GRIA3    | -1.06622 | 1.728934 | -4.08967 | 0.477568 |
| CDK5R2   | -1.19445 | 3.025336 | -4.08505 | 0.436953 |
| KLKB1    | -1.01823 | 1.35872  | -4.0757  | 0.493721 |
| CDK5R1   | -0.70439 | 0.110757 | -4.0746  | 0.613704 |
| CORO2B   | -0.68168 | 0.35776  | -4.07155 | 0.623439 |
| LRRC10B  | -0.96708 | 0.862585 | -4.07102 | 0.511539 |
| NECAB2   | -1.05715 | 1.596936 | -4.06799 | 0.480582 |
| DARC     | -1.30543 | 1.747735 | -4.06413 | 0.404601 |
| GPR17    | -0.70445 | 0.597861 | -4.06255 | 0.613676 |
| KLHDC8A  | -0.68555 | 1.212099 | -4.06284 | 0.621769 |
| SLC4A8   | -0.8298  | 0.541517 | -4.04793 | 0.562605 |
| KIAA0087 | -0.67887 | 0.08199  | -4.04794 | 0.624655 |
| SLC25A34 | -0.73082 | 0.767919 | -4.04703 | 0.602562 |
| CETP     | -0.85511 | -0.38496 | -4.04422 | 0.552824 |
| TTC16    | -0.68553 | -0.23165 | -4.04198 | 0.621779 |
| CTXN2    | -1.01079 | 0.78522  | -4.04048 | 0.496273 |
| FAM129C  | -1.4456  | 0.800198 | -4.03216 | 0.367138 |
| TBC1D10C | -0.87672 | 0.402358 | -4.03061 | 0.544605 |
| PRSS50   | -1.02219 | 0.44274  | -4.02972 | 0.49237  |
| FSD1     | -0.62801 | -0.33571 | -4.02825 | 0.647068 |
| GPRASP1  | -0.7301  | 0.961135 | -4.02559 | 0.602861 |
| REEP2    | -0.88317 | 0.704867 | -4.02467 | 0.542174 |
| FTCD     | -1.1962  | -0.0569  | -4.0194  | 0.436424 |
| CHRN2    | -1.16552 | 1.005288 | -4.0148  | 0.445805 |
| PPM1E    | -0.91968 | -0.32306 | -4.01239 | 0.528625 |
| UNC13A   | -1.10127 | 2.169837 | -4.01154 | 0.466106 |
| LASS1    | -0.93131 | 0.102827 | -4.00963 | 0.524383 |
| AQP7P1   | -0.7949  | 1.205771 | -4.00975 | 0.576384 |
| C3orf32  | -0.85765 | 0.398051 | -4.00516 | 0.551852 |
| RTN1     | -1.03774 | 0.592154 | -4.00458 | 0.487089 |
| DNASE1L3 | -1.16775 | -0.81046 | -4.00434 | 0.445115 |
| GNG3     | -0.68008 | 0.06858  | -4.00307 | 0.62413  |
| P2RY11   | -0.68812 | -0.02152 | -4.00103 | 0.620661 |
| ADAMTSL2 | -0.6355  | 2.307517 | -3.99976 | 0.643718 |
| SLC29A4  | -1.02776 | 0.698031 | -3.9989  | 0.49047  |
| MBL1P    | -0.71454 | 0.871479 | -3.99832 | 0.609401 |

|            |          |          |          |          |
|------------|----------|----------|----------|----------|
| MYT1       | -1.23042 | 0.215187 | -3.99697 | 0.426195 |
| MAPK10     | -0.71853 | 0.358115 | -3.99651 | 0.607716 |
| PATL2      | -0.75344 | 0.240623 | -3.994   | 0.593188 |
| NCRNA00085 | -0.6467  | 0.530638 | -3.99128 | 0.638739 |
| EBI3       | -0.78344 | 0.025842 | -3.99049 | 0.580981 |
| PCBP3      | -0.67957 | 1.50777  | -3.9868  | 0.62435  |
| FAM180B    | -0.8377  | 0.35064  | -3.98302 | 0.559534 |
| GALNTL1    | -0.95783 | 0.451314 | -3.98244 | 0.51483  |
| FEV        | -1.32755 | 2.92809  | -3.9818  | 0.398444 |
| SAMD11     | -0.69286 | 1.594189 | -3.98046 | 0.618625 |
| PRRT4      | -0.82941 | -1.10691 | -3.97306 | 0.562758 |
| AP3B2      | -1.11842 | 0.055142 | -3.97022 | 0.460598 |
| RHOXF1     | -0.62772 | -0.07539 | -3.9704  | 0.6472   |
| PTCHD2     | -0.96072 | 0.193125 | -3.96882 | 0.5138   |
| P2RX5      | -0.94692 | 0.193691 | -3.96887 | 0.518739 |
| NPB        | -0.76747 | -0.12157 | -3.96909 | 0.587445 |
| PTCH2      | -0.69392 | 1.346743 | -3.96735 | 0.61817  |
| RGAG4      | -0.70917 | 0.248625 | -3.96669 | 0.611672 |
| STAG3      | -0.83556 | -0.01862 | -3.96638 | 0.560364 |
| ZNF80      | -0.83595 | 0.473694 | -3.96359 | 0.560215 |
| C4orf39    | -0.64295 | -0.27649 | -3.9629  | 0.640401 |
| CHD5       | -1.03639 | 1.340457 | -3.96064 | 0.487544 |
| FBXL16     | -0.9662  | -0.8788  | -3.95994 | 0.511854 |
| FAM20A     | -0.68419 | 0.214196 | -3.9573  | 0.622353 |
| MYT1L      | -1.15887 | 1.762561 | -3.94984 | 0.447863 |
| FIGF       | -0.89931 | -0.18121 | -3.94723 | 0.536144 |
| C21orf56   | -0.66076 | -0.015   | -3.9468  | 0.632544 |
| LRRN3      | -0.84721 | -0.09761 | -3.94329 | 0.555859 |
| AGAP2      | -0.66494 | 0.191571 | -3.9407  | 0.630714 |
| HEPACAM    | -0.84232 | -0.64028 | -3.93842 | 0.557745 |
| ACTL6B     | -1.40345 | 1.858862 | -3.93687 | 0.378025 |
| HCN2       | -0.8497  | 0.203697 | -3.93158 | 0.5549   |
| GRIA2      | -1.30759 | 1.273157 | -3.92966 | 0.403997 |
| KEL        | -0.90758 | 0.059498 | -3.92042 | 0.53308  |
| RSPO4      | -0.72955 | -1.30558 | -3.92081 | 0.603091 |
| ACAP1      | -0.82344 | 0.722587 | -3.91317 | 0.565095 |
| INSRR      | -0.81095 | 0.896785 | -3.91357 | 0.570008 |
| WNT9B      | -0.65368 | 0.294836 | -3.91335 | 0.635659 |
| CAPN14     | -0.68737 | -0.57078 | -3.91237 | 0.620984 |
| SEMA3G     | -0.69202 | 0.430286 | -3.90447 | 0.618985 |
| PLIN1      | -1.45451 | 0.664079 | -3.9015  | 0.36488  |
| TNNT3      | -1.10369 | -0.11715 | -3.90201 | 0.465324 |
| TCEAL5     | -0.80895 | 0.74706  | -3.90086 | 0.570799 |
| JAKMIP3    | -0.64247 | 0.248033 | -3.90104 | 0.640617 |
| FAM155B    | -0.79928 | -0.13618 | -3.89624 | 0.574637 |
| CLEC4F     | -0.8395  | 0.592604 | -3.88486 | 0.558836 |

|           |          |          |          |          |
|-----------|----------|----------|----------|----------|
| CALY      | -1.58451 | 3.720688 | -3.88061 | 0.333437 |
| WDR17     | -0.9632  | 0.36696  | -3.8792  | 0.51292  |
| ZNF667    | -0.62426 | -0.04764 | -3.87618 | 0.648751 |
| SCN3A     | -0.87048 | 0.813264 | -3.87405 | 0.546964 |
| FLJ40330  | -0.85452 | 0.415832 | -3.85919 | 0.553051 |
| EIF4E1B   | -0.69963 | 0.401381 | -3.85818 | 0.615729 |
| LOC389332 | -1.21862 | 2.876495 | -3.84481 | 0.429692 |
| EFR3B     | -0.70442 | -0.73482 | -3.84305 | 0.613689 |
| RGS11     | -0.74414 | 1.550178 | -3.83877 | 0.597023 |
| FAM153A   | -0.89532 | 0.823559 | -3.83809 | 0.537626 |
| ZDHHC8P1  | -0.96132 | 0.780684 | -3.83719 | 0.513585 |
| TUSC5     | -1.47782 | 0.974848 | -3.83422 | 0.35903  |
| GLYAT     | -0.63897 | -1.30019 | -3.83314 | 0.64217  |
| ZSCAN1    | -0.77137 | -0.26374 | -3.83236 | 0.585862 |
| MRAP      | -1.03447 | 0.170963 | -3.8307  | 0.488195 |
| CRHBP     | -0.76522 | -0.87765 | -3.8288  | 0.588363 |
| KIF5C     | -0.9642  | 0.097912 | -3.82489 | 0.512563 |
| FAM57B    | -0.85323 | -0.03027 | -3.81973 | 0.553544 |
| C14orf180 | -1.0066  | 0.488938 | -3.81771 | 0.497717 |
| LCN12     | -0.77822 | 0.339871 | -3.81608 | 0.583085 |
| PSD       | -0.69228 | 2.2792   | -3.8124  | 0.618873 |
| NELL2     | -1.01513 | -1.23626 | -3.81216 | 0.494785 |
| HPCA      | -0.71647 | 1.147048 | -3.8022  | 0.608584 |
| DOCK3     | -0.7305  | -0.36114 | -3.80137 | 0.602694 |
| DAZL      | -0.70554 | 0.473293 | -3.79607 | 0.613214 |
| PRR22     | -0.68559 | -0.4321  | -3.78763 | 0.621751 |
| HAP1      | -0.95177 | 0.089931 | -3.78656 | 0.516998 |
| SLC7A10   | -0.89256 | -0.77405 | -3.7793  | 0.538659 |
| CELF3     | -1.50887 | 3.968216 | -3.77872 | 0.351387 |
| CAMK2B    | -1.28014 | 0.442709 | -3.77765 | 0.411754 |
| SNCB      | -1.04686 | 0.945735 | -3.77657 | 0.484019 |
| MATK      | -0.70841 | 0.003385 | -3.77027 | 0.611993 |
| ZNF831    | -1.00671 | 0.850381 | -3.76635 | 0.49768  |
| KIF26A    | -0.67517 | 0.090057 | -3.75363 | 0.626257 |
| TMEM145   | -0.98533 | 0.012913 | -3.75146 | 0.505108 |
| CYP46A1   | -0.77809 | -0.24617 | -3.74855 | 0.583137 |
| BTBD17    | -0.90639 | 0.760485 | -3.74766 | 0.533517 |
| PARVG     | -0.6716  | 0.652303 | -3.74473 | 0.627809 |
| MPP2      | -0.74749 | 0.124506 | -3.74343 | 0.595639 |
| FCN3      | -0.6611  | 0.433036 | -3.74131 | 0.632394 |
| CFD       | -0.79884 | 0.511946 | -3.73933 | 0.574809 |
| LOC440905 | -0.98358 | -0.12112 | -3.7369  | 0.505722 |
| SAMD3     | -0.73184 | 1.138683 | -3.73598 | 0.602134 |
| MAP4K1    | -0.85403 | 0.152233 | -3.7324  | 0.553237 |
| RIMBP2    | -1.24556 | 1.946578 | -3.72978 | 0.421744 |
| SLIT1     | -1.01989 | 0.264116 | -3.72822 | 0.493155 |

|              |          |          |          |          |
|--------------|----------|----------|----------|----------|
| BSN          | -0.85797 | 0.122539 | -3.72812 | 0.551728 |
| GRM4         | -1.29808 | 1.320519 | -3.72664 | 0.406668 |
| B4GALNT4     | -0.91437 | -0.6104  | -3.72358 | 0.530576 |
| TMPRSS6      | -1.03156 | 1.481053 | -3.72036 | 0.489182 |
| DUSP26       | -1.13015 | 2.45944  | -3.71916 | 0.456869 |
| CALB1        | -1.10772 | 0.803475 | -3.71725 | 0.464026 |
| TMEM179      | -1.09754 | 1.241365 | -3.71582 | 0.467314 |
| CD300LG      | -1.05271 | -0.66658 | -3.7139  | 0.482062 |
| FUT7         | -0.63935 | 0.195272 | -3.71322 | 0.642001 |
| CABP7        | -1.20355 | 2.569013 | -3.71236 | 0.434206 |
| CADM3        | -1.11512 | 0.450176 | -3.7115  | 0.461651 |
| CMTM5        | -0.75011 | -0.2187  | -3.70345 | 0.594558 |
| BAI1         | -0.72651 | 0.081579 | -3.70329 | 0.604362 |
| S100B        | -0.78332 | 0.83059  | -3.7029  | 0.581027 |
| CCL14        | -0.9833  | 0.955501 | -3.69992 | 0.50582  |
| UCN          | -0.65404 | -0.15689 | -3.69911 | 0.635496 |
| RIPPLY2      | -0.88065 | 0.592074 | -3.69815 | 0.543122 |
| ACCN4        | -0.68618 | -0.09742 | -3.69723 | 0.621496 |
| BNIPL        | -0.70093 | -2.18298 | -3.69694 | 0.615175 |
| ST8SIA5      | -0.65051 | -0.58762 | -3.69602 | 0.637054 |
| ARHGAP9      | -0.67262 | 0.625305 | -3.69459 | 0.627367 |
| ZDHHC22      | -0.85221 | 0.421611 | -3.69397 | 0.553936 |
| ATP1A2       | -1.0544  | -0.15616 | -3.69358 | 0.481496 |
| RASD1        | -0.87767 | 0.32797  | -3.69335 | 0.544246 |
| KCNC1        | -1.03587 | 0.483054 | -3.68427 | 0.487723 |
| BMPER        | -0.8053  | -0.69697 | -3.68136 | 0.572244 |
| KCNK12       | -0.67947 | 0.541688 | -3.66887 | 0.624395 |
| TTC18        | -0.70894 | 0.139449 | -3.66707 | 0.61177  |
| F7           | -0.81729 | -0.26686 | -3.66334 | 0.567506 |
| MAST1        | -0.81356 | -0.05859 | -3.65759 | 0.568974 |
| FLJ45445     | -0.76694 | 0.922939 | -3.65769 | 0.587664 |
| AFF3         | -0.83358 | -1.18164 | -3.65317 | 0.561135 |
| GPR123       | -0.99695 | 1.549376 | -3.64809 | 0.501056 |
| LY6H         | -0.87867 | 1.525509 | -3.64769 | 0.543869 |
| FCRL2        | -1.15499 | 1.101172 | -3.64733 | 0.449069 |
| NAT8L        | -0.92716 | -0.53204 | -3.64663 | 0.525891 |
| PPP1R1A      | -1.4378  | 1.653894 | -3.64637 | 0.369129 |
| LOC642597    | -0.96332 | 1.628409 | -3.63911 | 0.512877 |
| KCNH3        | -0.80302 | 0.277566 | -3.63652 | 0.573148 |
| PTGDS        | -0.92523 | 1.520051 | -3.63285 | 0.526595 |
| MAP6         | -0.71127 | 1.269134 | -3.63167 | 0.610781 |
| RND2         | -0.6555  | -1.30996 | -3.63052 | 0.634857 |
| RYR3         | -0.62414 | -0.92106 | -3.62683 | 0.648807 |
| NR0B1        | -1.19209 | 1.90611  | -3.62486 | 0.437668 |
| LOC100302650 | -0.71259 | 0.182849 | -3.6219  | 0.610222 |
| GNG2         | -0.65534 | 0.446041 | -3.62032 | 0.634926 |

|           |          |          |          |          |
|-----------|----------|----------|----------|----------|
| P2RX6     | -0.71871 | 0.251804 | -3.61605 | 0.607642 |
| SYT5      | -1.202   | 2.337937 | -3.6136  | 0.434674 |
| SEZ6      | -1.19859 | 1.717914 | -3.60874 | 0.4357   |
| C19orf36  | -0.62889 | 0.509204 | -3.60612 | 0.646676 |
| IQSEC3    | -0.83093 | 1.178938 | -3.60367 | 0.562165 |
| ADIPOQ    | -1.95151 | 1.904391 | -3.60165 | 0.258546 |
| SYN1      | -0.67885 | 1.394256 | -3.6016  | 0.624664 |
| SYP       | -1.00769 | 1.285623 | -3.60002 | 0.497341 |
| FAM159A   | -0.67856 | 0.714168 | -3.60005 | 0.624787 |
| CIDEA     | -1.2047  | 0.279626 | -3.59687 | 0.43386  |
| SLC6A17   | -1.13882 | 2.073935 | -3.59676 | 0.454132 |
| C3orf36   | -0.63762 | 1.673401 | -3.59595 | 0.642771 |
| C1orf127  | -1.21191 | 2.913154 | -3.59322 | 0.431696 |
| DPY19L2P4 | -0.68581 | -0.45794 | -3.58958 | 0.621656 |
| EMCN      | -0.64082 | 0.175485 | -3.58722 | 0.641346 |
| BAI3      | -0.895   | 0.804925 | -3.58668 | 0.537746 |
| ASCL2     | -0.78755 | -0.41094 | -3.5813  | 0.579326 |
| TMEM63C   | -1.26739 | 0.171124 | -3.57958 | 0.415412 |
| DLG2      | -0.78112 | 0.469104 | -3.5792  | 0.581915 |
| WDR86     | -0.7159  | 0.41841  | -3.57881 | 0.608826 |
| JPH4      | -0.72471 | 0.053881 | -3.57607 | 0.605119 |
| NKAIN1    | -0.74853 | -1.42902 | -3.57519 | 0.59521  |
| KCNQ2     | -1.15401 | 1.203252 | -3.5749  | 0.449375 |
| CNR1      | -0.87992 | 1.020114 | -3.57127 | 0.543398 |
| LCN6      | -0.66677 | 0.386037 | -3.56702 | 0.629917 |
| HEPN1     | -0.68998 | -0.83393 | -3.56473 | 0.619864 |
| HOXA7     | -0.72641 | -1.51271 | -3.55956 | 0.604404 |
| LRRC50    | -0.74425 | -0.3576  | -3.55553 | 0.596978 |
| SSTR3     | -1.17031 | 2.310048 | -3.55064 | 0.444327 |
| CBLN4     | -1.00142 | 1.439833 | -3.53702 | 0.499508 |
| 4-Mar     | -0.98057 | 2.29217  | -3.53136 | 0.506779 |
| RGS22     | -0.72396 | 0.719158 | -3.52865 | 0.605432 |
| KCNC2     | -0.76516 | -0.0222  | -3.5261  | 0.588388 |
| F10       | -0.79974 | 2.092645 | -3.52485 | 0.574453 |
| DNASE1L2  | -0.71933 | 0.100598 | -3.5221  | 0.607379 |
| PPP1R16B  | -0.63241 | 0.235959 | -3.52188 | 0.645097 |
| TMEM121   | -0.68167 | -0.05159 | -3.51821 | 0.623444 |
| CDH10     | -1.10517 | 1.318577 | -3.51254 | 0.464846 |
| DPYSL4    | -0.73405 | 0.619666 | -3.51027 | 0.601212 |
| TMC8      | -0.63275 | 0.562008 | -3.51058 | 0.644948 |
| TAGLN3    | -1.16523 | 1.90508  | -3.50883 | 0.445894 |
| KCNH6     | -1.35347 | 2.222117 | -3.50206 | 0.391349 |
| DSCAML1   | -0.97819 | 1.13255  | -3.5014  | 0.507617 |
| RUNDC3B   | -0.6312  | 0.039022 | -3.50047 | 0.645641 |
| GPR113    | -0.66191 | 0.294572 | -3.49902 | 0.632043 |
| ODZ2      | -0.81111 | 0.376164 | -3.49791 | 0.569943 |

|              |          |          |          |          |
|--------------|----------|----------|----------|----------|
| GNAO1        | -0.74949 | 1.136611 | -3.49791 | 0.594816 |
| LOC162632    | -0.90775 | 0.353429 | -3.49737 | 0.533015 |
| TBX1         | -0.78659 | -1.10925 | -3.49287 | 0.579712 |
| TTBK1        | -0.75317 | 0.399144 | -3.49041 | 0.593297 |
| DPF1         | -0.62695 | -0.91593 | -3.48621 | 0.647545 |
| PLD4         | -0.7914  | 0.535843 | -3.48551 | 0.577783 |
| MAP3K15      | -1.21149 | 1.247421 | -3.48239 | 0.431824 |
| INA          | -1.10332 | 1.926569 | -3.48011 | 0.465443 |
| GCK          | -1.05611 | 2.139817 | -3.47637 | 0.480926 |
| ARHGAP15     | -0.68638 | 0.525714 | -3.47539 | 0.621411 |
| STXBP5L      | -1.07114 | 0.841631 | -3.47443 | 0.475943 |
| RXRG         | -1.17612 | 0.624758 | -3.47268 | 0.44254  |
| SCAMP5       | -0.65468 | 0.331935 | -3.47035 | 0.635216 |
| FAM184A      | -0.63034 | -0.77412 | -3.46029 | 0.646024 |
| PSTPIP1      | -0.63942 | 0.411942 | -3.45408 | 0.641972 |
| CACNA2D2     | -0.98222 | 0.793368 | -3.45215 | 0.506199 |
| P2RY8        | -0.65171 | 0.494488 | -3.44752 | 0.636526 |
| PROK1        | -0.82385 | 0.379676 | -3.447   | 0.564934 |
| SCG2         | -1.02772 | 3.915725 | -3.4467  | 0.490484 |
| C19orf30     | -1.34506 | 4.06727  | -3.43877 | 0.393638 |
| SLC6A16      | -0.68297 | 0.034623 | -3.4387  | 0.622882 |
| SVOP         | -1.27794 | 3.239154 | -3.43832 | 0.412385 |
| SELP         | -0.83905 | 1.806044 | -3.43588 | 0.559013 |
| JPH3         | -0.78109 | 1.470924 | -3.43137 | 0.581927 |
| LOC100188949 | -0.66349 | 0.724225 | -3.43102 | 0.63135  |
| CACNA1B      | -1.09262 | 0.527383 | -3.42864 | 0.46891  |
| FMN2         | -1.05368 | 1.731681 | -3.42317 | 0.481739 |
| SEZ6L        | -1.26438 | 2.756138 | -3.42137 | 0.416279 |
| NOL4         | -1.22619 | 2.049495 | -3.40829 | 0.427445 |
| GRM7         | -0.67737 | 0.551305 | -3.40436 | 0.625306 |
| ZNF385D      | -0.77176 | 1.173024 | -3.40155 | 0.585701 |
| TMEM196      | -1.04321 | 2.108437 | -3.40073 | 0.485247 |
| GFRA2        | -0.66821 | -0.28759 | -3.38959 | 0.629288 |
| PAX6         | -0.82432 | 1.378371 | -3.38801 | 0.56475  |
| TMEM59L      | -0.81369 | 1.726545 | -3.38679 | 0.568925 |
| CASKIN1      | -0.78797 | -1.38562 | -3.38087 | 0.57916  |
| KCNJ10       | -0.65668 | -1.61232 | -3.37893 | 0.634335 |
| GNG4         | -0.8863  | 1.085081 | -3.36864 | 0.541001 |
| UNC80        | -1.2346  | 1.901895 | -3.36441 | 0.424961 |
| C14orf115    | -0.68156 | 1.349744 | -3.36223 | 0.623493 |
| CCDC151      | -0.65647 | -0.52709 | -3.35624 | 0.634429 |
| HRNBP3       | -0.81887 | 0.364703 | -3.35506 | 0.566885 |
| PNMT         | -0.87332 | 0.809132 | -3.35488 | 0.545888 |
| WNT6         | -0.63257 | -0.21869 | -3.35116 | 0.645027 |
| RMST         | -0.78673 | 0.374455 | -3.3463  | 0.579656 |
| LONRF2       | -0.72101 | 0.99296  | -3.34351 | 0.606675 |

|          |          |          |          |          |
|----------|----------|----------|----------|----------|
| CCR7     | -0.9677  | 0.958757 | -3.3416  | 0.511321 |
| NRSN1    | -0.84081 | 1.154679 | -3.33706 | 0.55833  |
| ST18     | -1.07316 | 2.668705 | -3.33265 | 0.475278 |
| RAB39B   | -0.84793 | -0.21234 | -3.33141 | 0.555581 |
| CD79B    | -0.95006 | 0.670711 | -3.32646 | 0.51761  |
| HMGCLL1  | -1.01437 | 1.616494 | -3.32484 | 0.495045 |
| MCOLN2   | -0.67167 | -0.03945 | -3.31884 | 0.627782 |
| CXorf57  | -0.68036 | 0.516551 | -3.31615 | 0.624011 |
| KCNA5    | -0.93731 | 1.804409 | -3.31597 | 0.522205 |
| SCG5     | -1.03203 | 3.898225 | -3.31469 | 0.489021 |
| PPP2R2B  | -0.64873 | 0.878707 | -3.31324 | 0.637843 |
| FAM153B  | -0.72936 | 0.753577 | -3.31262 | 0.603169 |
| DYNC1I1  | -0.69096 | 0.737269 | -3.3113  | 0.619442 |
| C7orf52  | -1.02471 | 1.137706 | -3.30966 | 0.491508 |
| ASTN1    | -0.98593 | 0.524243 | -3.30799 | 0.5049   |
| MGAT4C   | -0.75269 | 0.062258 | -3.30806 | 0.593495 |
| APLNR    | -0.62495 | 1.133362 | -3.30308 | 0.648443 |
| CELF4    | -0.92532 | 0.800163 | -3.29976 | 0.526563 |
| C1QL1    | -0.97918 | 0.369036 | -3.29725 | 0.507267 |
| FLJ43390 | -1.30858 | 3.774262 | -3.29671 | 0.403718 |
| ADRA2C   | -0.65401 | 0.958143 | -3.29545 | 0.635514 |
| FAM151A  | -0.71519 | -0.25334 | -3.29495 | 0.609126 |
| DCX      | -0.87006 | 1.156465 | -3.29349 | 0.547125 |
| KLHL14   | -0.85741 | -0.96543 | -3.29062 | 0.551944 |
| AQP7     | -0.71027 | 1.586854 | -3.28272 | 0.611205 |
| C8orf84  | -0.63755 | 0.082263 | -3.27948 | 0.642805 |
| CHODL    | -0.6492  | -0.94934 | -3.27686 | 0.637633 |
| LGI3     | -0.97442 | -0.05009 | -3.27646 | 0.508946 |
| GRIK5    | -0.82182 | 0.863337 | -3.27247 | 0.565729 |
| RTN4RL1  | -0.74739 | 0.275177 | -3.26968 | 0.595682 |
| ITIH1    | -0.82895 | 1.017724 | -3.26753 | 0.562939 |
| NEFH     | -0.64513 | -0.09404 | -3.26667 | 0.639436 |
| SNAP25   | -0.92657 | 2.049423 | -3.26637 | 0.526107 |
| BLK      | -1.27356 | 1.335143 | -3.26551 | 0.413638 |
| NAPSB    | -0.78801 | 1.055447 | -3.2641  | 0.579144 |
| CDO1     | -0.67085 | 1.253559 | -3.2614  | 0.628138 |
| SSTR2    | -0.78825 | 0.570502 | -3.23836 | 0.579047 |
| NTS      | -1.18759 | 0.312304 | -3.23611 | 0.439036 |
| TF       | -0.97304 | -1.11643 | -3.23612 | 0.509433 |
| GP1BA    | -0.79806 | 0.139999 | -3.23449 | 0.575121 |
| MAL      | -0.8154  | -2.08863 | -3.23088 | 0.56825  |
| FRMPD1   | -0.84659 | -0.16978 | -3.22936 | 0.556099 |
| PAX4     | -0.7153  | 1.336717 | -3.22556 | 0.609079 |
| KIF19    | -0.85434 | 0.960591 | -3.22317 | 0.553117 |
| OXGR1    | -0.71193 | -0.5238  | -3.22312 | 0.610504 |
| NXF2     | -0.83151 | 0.056393 | -3.22255 | 0.56194  |

## Supplementary Material

|              |          |          |          |          |
|--------------|----------|----------|----------|----------|
| VPREB3       | -1.08804 | 0.619901 | -3.21669 | 0.4704   |
| PCDHA3       | -0.63366 | 1.201311 | -3.20883 | 0.64454  |
| TNMD         | -0.72767 | -0.36873 | -3.20668 | 0.603878 |
| 10-Mar       | -0.66172 | 0.233778 | -3.20508 | 0.632126 |
| HIF3A        | -0.62798 | 1.363314 | -3.20422 | 0.647083 |
| C5orf20      | -0.79784 | 0.028748 | -3.20047 | 0.575211 |
| CNTFR        | -1.02743 | -0.98596 | -3.19925 | 0.490582 |
| RGS7         | -0.78372 | 2.054046 | -3.1986  | 0.580866 |
| PTPRN        | -1.16267 | 5.564357 | -3.19698 | 0.446685 |
| NAP1L2       | -0.72228 | 0.083685 | -3.19097 | 0.606138 |
| LOC100132354 | -0.64924 | 0.716682 | -3.18627 | 0.637617 |
| DPYS         | -0.65632 | -0.93508 | -3.1827  | 0.634495 |
| BCL11A       | -0.69592 | -0.30373 | -3.17933 | 0.617315 |
| BTLA         | -0.84691 | 0.602267 | -3.17894 | 0.555974 |
| MAPK8IP2     | -0.76787 | 0.039103 | -3.17861 | 0.587284 |
| GNAZ         | -0.63779 | 0.377684 | -3.17171 | 0.642698 |
| KCNJ11       | -0.77697 | 0.783974 | -3.16366 | 0.58359  |
| PTPRQ        | -0.63395 | -0.1657  | -3.16098 | 0.644409 |
| CD37         | -0.67222 | 0.830292 | -3.15973 | 0.627542 |
| IGSF11       | -0.68356 | 0.860837 | -3.15916 | 0.622626 |
| C1orf168     | -0.90753 | 0.200846 | -3.15845 | 0.533095 |
| IRX2         | -1.10603 | -0.62181 | -3.15656 | 0.464571 |
| ARX          | -1.14241 | 2.352593 | -3.15606 | 0.453002 |
| ATCAY        | -0.9512  | 1.616401 | -3.1557  | 0.517204 |
| VWDE         | -0.99518 | 1.441825 | -3.15463 | 0.501672 |
| APOE         | -0.69129 | -0.32451 | -3.15455 | 0.619299 |
| PRR18        | -0.66328 | 0.105363 | -3.15429 | 0.631441 |
| TCL1A        | -1.4211  | 1.006958 | -3.14868 | 0.373427 |
| RSPH4A       | -0.64197 | -0.28538 | -3.14847 | 0.640838 |
| PLCXD3       | -0.89439 | 2.735429 | -3.14589 | 0.537973 |
| HHATL        | -0.86997 | -0.45983 | -3.14555 | 0.547158 |
| RFX6         | -1.21026 | 3.904981 | -3.1314  | 0.432192 |
| FFAR1        | -1.0082  | 2.656742 | -3.13144 | 0.497165 |
| BEX2         | -0.74704 | -0.14904 | -3.12768 | 0.595825 |
| MAPT         | -0.75697 | -1.16182 | -3.12487 | 0.591737 |
| CD22         | -0.92203 | 0.595437 | -3.12399 | 0.527767 |
| LHFPL4       | -1.08466 | 2.574168 | -3.1234  | 0.471503 |
| DSCAM        | -0.93975 | 0.937318 | -3.12329 | 0.521323 |
| CACNA1G      | -0.65082 | -0.06238 | -3.11717 | 0.636917 |
| TCEAL2       | -0.98322 | 1.11108  | -3.11536 | 0.505849 |
| TEKT2        | -0.76276 | 0.364353 | -3.11295 | 0.589369 |
| ABCC8        | -1.457   | 5.312901 | -3.11216 | 0.364249 |
| INSM1        | -1.15054 | 3.125834 | -3.10781 | 0.450458 |
| NPM2         | -0.70671 | 0.830461 | -3.10687 | 0.612715 |
| ODZ1         | -0.82616 | -1.41658 | -3.10674 | 0.56403  |
| GIPR         | -0.71826 | 3.301002 | -3.10338 | 0.60783  |



|           |          |          |          |          |
|-----------|----------|----------|----------|----------|
| KCNB2     | -0.81105 | 1.806757 | -3.09999 | 0.569967 |
| NFASC     | -0.64123 | 0.828458 | -3.09783 | 0.641166 |
| KLRK1     | -0.65515 | 0.240423 | -3.09185 | 0.635011 |
| OLFM1     | -0.65801 | 0.450373 | -3.09164 | 0.633753 |
| VGF       | -1.06795 | 2.933798 | -3.09139 | 0.476995 |
| EFNB3     | -0.64534 | 0.409503 | -3.08606 | 0.639344 |
| TRAF3IP3  | -0.6417  | 0.48156  | -3.08582 | 0.640956 |
| NTRK3     | -0.62536 | -0.32879 | -3.08518 | 0.648256 |
| FCER2     | -1.26925 | 1.074202 | -3.0842  | 0.414875 |
| BEX1      | -1.17632 | 2.473284 | -3.07933 | 0.44248  |
| LGI1      | -0.71184 | 0.617874 | -3.07081 | 0.610542 |
| ANK2      | -0.69794 | 0.246071 | -3.06594 | 0.61645  |
| ASPA      | -0.62486 | 0.335586 | -3.06186 | 0.648481 |
| SLC16A11  | -0.65787 | 0.395856 | -3.05883 | 0.633812 |
| ADCYAP1   | -1.02119 | 3.52895  | -3.0521  | 0.49271  |
| SBK2      | -0.65439 | 0.791984 | -3.05196 | 0.635345 |
| PON1      | -0.84179 | 0.529419 | -3.0507  | 0.557951 |
| ACSL6     | -0.73234 | -0.22147 | -3.05078 | 0.601925 |
| RGS9      | -0.71397 | 1.503384 | -3.04639 | 0.609641 |
| RERGL     | -0.79585 | 0.486351 | -3.03755 | 0.576002 |
| ANKRD55   | -0.6394  | 0.322672 | -3.03676 | 0.64198  |
| KIAA1409  | -0.98644 | 1.276231 | -3.03383 | 0.504721 |
| ATP1A3    | -0.86202 | 0.589288 | -3.02594 | 0.550183 |
| PCDHA1    | -0.83247 | 0.240081 | -3.02495 | 0.561566 |
| TACR1     | -0.75728 | 0.29227  | -3.02265 | 0.591611 |
| KCNH2     | -0.74881 | 1.935123 | -3.02045 | 0.595093 |
| DRD2      | -0.69175 | 0.548632 | -3.01626 | 0.619103 |
| CCL19     | -1.26327 | 2.324693 | -3.01294 | 0.416598 |
| KL        | -0.76808 | 0.246189 | -3.01297 | 0.5872   |
| C1orf175  | -0.6499  | 1.25716  | -3.00999 | 0.637324 |
| TNNT2     | -0.88459 | 1.148688 | -3.00832 | 0.541642 |
| UGT2B4    | -0.83824 | -0.1979  | -3.00623 | 0.559326 |
| PPP4R4    | -0.82566 | -0.35669 | -3.00247 | 0.564224 |
| PLIN4     | -1.08001 | 0.678995 | -2.99728 | 0.473024 |
| POMC      | -0.6506  | 0.321389 | -2.99223 | 0.637017 |
| TLR10     | -0.80564 | 0.501907 | -2.99145 | 0.572108 |
| SPAG6     | -0.89747 | -0.18756 | -2.98687 | 0.536826 |
| PRG4      | -0.72825 | 2.899617 | -2.98567 | 0.603637 |
| LOC283174 | -0.64765 | 1.4508   | -2.98267 | 0.638321 |
| PCP4      | -0.9333  | 0.705458 | -2.98094 | 0.523659 |
| TMEM132C  | -0.80697 | 2.296961 | -2.98023 | 0.571579 |
| CRYBA2    | -1.34051 | 4.276082 | -2.97904 | 0.39488  |
| LINGO4    | -0.64226 | 0.190519 | -2.97827 | 0.640711 |
| MAPK4     | -0.82438 | 0.126555 | -2.97522 | 0.564724 |
| CBLN1     | -0.80726 | 0.904684 | -2.973   | 0.571466 |
| CCNA1     | -0.62538 | -0.77056 | -2.97068 | 0.648247 |

|           |          |          |          |          |
|-----------|----------|----------|----------|----------|
| ZNHIT2    | -0.63203 | 0.512264 | -2.97    | 0.645266 |
| GZMM      | -0.65084 | 0.222172 | -2.96449 | 0.636907 |
| MSI1      | -0.63421 | 0.333308 | -2.9609  | 0.644296 |
| C4orf7    | -1.44018 | 2.808245 | -2.95955 | 0.368522 |
| SLCO1A2   | -0.67713 | -1.30425 | -2.948   | 0.625407 |
| C12orf34  | -0.64776 | -0.29322 | -2.94638 | 0.638272 |
| GPR142    | -0.81671 | 2.175908 | -2.94526 | 0.567733 |
| FCRL1     | -1.10419 | 1.017199 | -2.94505 | 0.465163 |
| FAM71E2   | -0.72976 | 0.763751 | -2.94222 | 0.603005 |
| AGT       | -0.72061 | 1.775999 | -2.9421  | 0.606841 |
| AMH       | -0.87471 | 0.296914 | -2.93591 | 0.545365 |
| APLP1     | -0.84606 | 2.225724 | -2.93164 | 0.556302 |
| GJD2      | -1.11651 | 3.459355 | -2.92104 | 0.461207 |
| KCNMB2    | -1.03263 | 2.311613 | -2.91989 | 0.488819 |
| SLC35F4   | -0.63896 | 0.810212 | -2.91898 | 0.642174 |
| IGFN1     | -0.83299 | 1.066397 | -2.91616 | 0.561364 |
| NKX2-2    | -1.20768 | 4.342805 | -2.91477 | 0.432965 |
| DCLK1     | -0.64215 | 0.015486 | -2.91221 | 0.640758 |
| THRSP     | -0.83338 | -1.1583  | -2.90114 | 0.561214 |
| TNFRSF13B | -0.88519 | 0.681281 | -2.90061 | 0.541417 |
| DPYSL5    | -0.70792 | -0.17252 | -2.89804 | 0.612201 |
| OGDHL     | -0.95472 | -0.27662 | -2.89792 | 0.515941 |
| HLA-DOB   | -0.69729 | 0.721378 | -2.89556 | 0.616728 |
| TNFRSF13C | -0.76568 | 0.370002 | -2.89491 | 0.588174 |
| ADH1B     | -1.06868 | 2.829442 | -2.88747 | 0.476756 |
| NCF1      | -0.63622 | 0.450022 | -2.88375 | 0.643396 |
| NRXN1     | -0.88293 | 2.565223 | -2.87756 | 0.542265 |
| SERPINA10 | -0.97867 | 1.818929 | -2.87454 | 0.507446 |
| FAIM3     | -0.70457 | 0.560106 | -2.87416 | 0.613627 |
| SLITRK2   | -0.63667 | -0.11089 | -2.86539 | 0.643197 |
| DPY19L2P1 | -0.63682 | -0.98608 | -2.86379 | 0.643128 |
| LOC389493 | -0.75981 | 0.521497 | -2.85958 | 0.590576 |
| C1orf158  | -0.65707 | 0.283045 | -2.8563  | 0.634166 |
| SYCE1L    | -0.74196 | 0.284353 | -2.85559 | 0.597928 |
| PLA2G2D   | -0.9652  | 0.430357 | -2.85152 | 0.512206 |
| MCOLN3    | -0.69665 | 0.605217 | -2.84746 | 0.617003 |
| IRX1      | -0.84279 | -1.03102 | -2.84344 | 0.557564 |
| CHGA      | -1.32038 | 6.586079 | -2.83623 | 0.400429 |
| LOC284749 | -0.76547 | 0.931309 | -2.83532 | 0.588262 |
| CLU       | -0.63788 | 0.311312 | -2.83405 | 0.642657 |
| GLRA3     | -0.64565 | 0.51994  | -2.83254 | 0.639206 |
| FAM5B     | -0.63659 | -0.79751 | -2.82791 | 0.643231 |
| C5orf49   | -0.64156 | 0.079702 | -2.82289 | 0.641018 |
| GPR18     | -0.65962 | 0.385659 | -2.82072 | 0.633043 |
| PLCH2     | -0.65612 | 0.949605 | -2.81421 | 0.634581 |
| PACSIN1   | -0.66398 | -0.23913 | -2.80764 | 0.631133 |

|               |          |          |          |          |
|---------------|----------|----------|----------|----------|
| FAM123C       | -0.95051 | 3.03474  | -2.80717 | 0.51745  |
| LECT1         | -0.72106 | 0.679969 | -2.80562 | 0.606651 |
| TPO           | -0.70345 | 0.512954 | -2.80226 | 0.614104 |
| PTPN5         | -0.71539 | 1.476811 | -2.79806 | 0.609041 |
| KIAA0748      | -0.6526  | 0.536905 | -2.79749 | 0.636131 |
| DKFZp434J0226 | -0.72056 | 2.305441 | -2.79692 | 0.60686  |
| INE2          | -0.75527 | -0.74428 | -2.79353 | 0.592435 |
| CTNNA2        | -0.75369 | 0.941649 | -2.7925  | 0.593087 |
| NCF1B         | -0.62545 | 0.421916 | -2.79249 | 0.648218 |
| PI16          | -1.09437 | 1.492588 | -2.79199 | 0.468342 |
| NEFM          | -0.64498 | 1.229669 | -2.79119 | 0.6395   |
| FABP4         | -1.02304 | 1.08765  | -2.78676 | 0.492079 |
| IGSF1         | -0.81807 | 0.566907 | -2.78539 | 0.5672   |
| SLC35F3       | -0.73465 | 1.051698 | -2.78212 | 0.600963 |
| RASGRF1       | -0.84423 | 1.06134  | -2.78077 | 0.557008 |
| KIAA0125      | -0.9429  | 0.59634  | -2.77846 | 0.520186 |
| ACTC1         | -0.8441  | 0.467959 | -2.77209 | 0.557059 |
| CD19          | -1.14627 | 0.855191 | -2.76279 | 0.451791 |
| C1orf173      | -0.73707 | -0.06372 | -2.761   | 0.599958 |
| CNTN2         | -0.69076 | 0.277268 | -2.76027 | 0.619528 |
| HMP19         | -0.84349 | 2.393335 | -2.7591  | 0.557296 |
| KCNB1         | -0.72439 | -0.01609 | -2.75636 | 0.605253 |
| C16orf89      | -0.81016 | 0.687134 | -2.7501  | 0.570319 |
| C4orf48       | -0.87032 | 0.695726 | -2.74712 | 0.547026 |
| CXCR5         | -0.90502 | 1.307041 | -2.74658 | 0.534026 |
| TRPM5         | -0.85902 | 3.018761 | -2.74595 | 0.551329 |
| DACH2         | -0.72017 | 0.912305 | -2.7452  | 0.607028 |
| GABRG2        | -0.8296  | 1.095069 | -2.74508 | 0.562686 |
| L1CAM         | -0.7859  | 1.303095 | -2.74466 | 0.579989 |
| KCNJ6         | -0.68084 | 1.654029 | -2.74392 | 0.6238   |
| SULT4A1       | -0.77569 | 1.003118 | -2.7363  | 0.584108 |
| KCNH8         | -0.6371  | 2.447243 | -2.73602 | 0.643004 |
| SORCS1        | -0.74445 | 0.99102  | -2.73179 | 0.596897 |
| CYP2C8        | -0.7395  | 1.578518 | -2.72733 | 0.598945 |
| LEP           | -1.04959 | 1.159216 | -2.72265 | 0.483105 |
| DPP6          | -0.97165 | 2.332919 | -2.71992 | 0.509922 |
| SCG3          | -1.15006 | 4.193168 | -2.71927 | 0.450605 |
| LGALS12       | -0.66432 | 0.512815 | -2.71353 | 0.630984 |
| CD27          | -0.64064 | 0.399461 | -2.69875 | 0.641428 |
| CLGN          | -0.81884 | -0.53522 | -2.69627 | 0.566897 |
| RELN          | -0.91048 | 1.355233 | -2.6932  | 0.532007 |
| LOC145837     | -0.7407  | -0.4532  | -2.68833 | 0.598449 |
| GRIK3         | -0.63218 | 0.67372  | -2.6884  | 0.645202 |
| ADH1A         | -0.77287 | 1.800092 | -2.68739 | 0.585253 |
| SH3GL2        | -0.95755 | 1.20174  | -2.68721 | 0.514929 |
| RAB3C         | -0.66048 | 2.114815 | -2.68384 | 0.632667 |

|           |          |          |          |          |
|-----------|----------|----------|----------|----------|
| SYT7      | -0.70041 | 0.803595 | -2.68272 | 0.615396 |
| CD48      | -0.63068 | 0.520297 | -2.68224 | 0.645872 |
| PCSK1     | -0.98987 | 3.494406 | -2.67534 | 0.503524 |
| CHRNA1    | -0.66204 | 0.569235 | -2.67281 | 0.631982 |
| CLEC17A   | -0.79735 | 0.705178 | -2.67118 | 0.575406 |
| FCRLA     | -1.00523 | 0.122642 | -2.66742 | 0.498191 |
| LRFN2     | -0.64633 | 0.418411 | -2.65783 | 0.638902 |
| KCNIP1    | -0.7282  | 1.326268 | -2.65572 | 0.603657 |
| CAPSL     | -0.76261 | -0.14856 | -2.65404 | 0.589428 |
| CPLX2     | -1.1865  | 4.296433 | -2.65355 | 0.439366 |
| NCF1C     | -0.63328 | 0.426044 | -2.64664 | 0.644708 |
| NCAM1     | -0.72208 | 0.674593 | -2.64324 | 0.606223 |
| CA10      | -0.69998 | 0.053437 | -2.6359  | 0.615582 |
| GPD1      | -0.73396 | 1.69957  | -2.63114 | 0.60125  |
| C19orf20  | -0.69438 | -0.02664 | -2.6307  | 0.617976 |
| CD1E      | -0.70701 | 1.332414 | -2.62927 | 0.612589 |
| AVPR1B    | -0.62925 | 1.125793 | -2.628   | 0.646513 |
| SYT4      | -1.03887 | 4.113204 | -2.62289 | 0.486708 |
| MS4A1     | -1.26213 | 1.167415 | -2.62181 | 0.416928 |
| LMO1      | -0.76586 | 1.034764 | -2.61904 | 0.588101 |
| VTN       | -0.91932 | 3.113579 | -2.61627 | 0.528759 |
| CHGB      | -1.18927 | 5.573051 | -2.61594 | 0.438524 |
| TTLL6     | -0.6829  | 2.410403 | -2.61059 | 0.622914 |
| RIMS2     | -0.78702 | -0.01819 | -2.61007 | 0.579539 |
| PART1     | -0.81991 | -0.62456 | -2.60988 | 0.566478 |
| NEURL     | -0.78681 | 2.427322 | -2.59896 | 0.579623 |
| LOC126536 | -0.76818 | 2.208686 | -2.59394 | 0.587157 |
| FCRL3     | -0.8359  | 0.905579 | -2.59262 | 0.560233 |
| XKR7      | -0.64991 | 0.879005 | -2.59041 | 0.63732  |
| ABCA8     | -0.70834 | 1.386693 | -2.57782 | 0.612024 |
| PCDH8     | -0.67807 | 0.165265 | -2.57698 | 0.624999 |
| CNR2      | -0.79803 | 0.740531 | -2.57297 | 0.575134 |
| ANKS1B    | -0.65387 | -0.91875 | -2.57239 | 0.635574 |
| C1orf230  | -0.67461 | 1.080578 | -2.57058 | 0.626501 |
| GPR44     | -0.65165 | 1.517203 | -2.56479 | 0.636553 |
| SCARA5    | -1.021   | 1.174504 | -2.56318 | 0.492774 |
| SLC7A14   | -0.92659 | 2.970634 | -2.55754 | 0.526099 |
| APOH      | -1.02869 | 3.702684 | -2.54866 | 0.490156 |
| GZMK      | -0.69119 | 0.88265  | -2.54452 | 0.619343 |
| VIT       | -0.73759 | 0.626403 | -2.54304 | 0.599738 |
| TMEM132D  | -0.89924 | 2.102583 | -2.54228 | 0.53617  |
| WNK4      | -0.77715 | -0.04496 | -2.53951 | 0.583517 |
| HCN4      | -0.6314  | 1.008653 | -2.53964 | 0.645548 |
| UPK3BL    | -0.72532 | -0.19906 | -2.53672 | 0.604862 |
| SCRT2     | -0.62578 | 0.891467 | -2.53123 | 0.648067 |
| SFRP1     | -0.78914 | 0.530132 | -2.52412 | 0.57869  |

|         |          |          |          |          |
|---------|----------|----------|----------|----------|
| CLEC18B | -0.62472 | -0.15206 | -2.52085 | 0.648544 |
| SLC6A4  | -0.80339 | 1.265223 | -2.51964 | 0.573003 |
| COL4A3  | -0.68944 | 0.067251 | -2.51408 | 0.620096 |
| CFHR1   | -0.63562 | 0.263842 | -2.51041 | 0.643666 |
| MIOX    | -0.67422 | 0.588339 | -2.49384 | 0.626671 |
| KCNA6   | -0.65102 | 1.779859 | -2.49022 | 0.636829 |
| ASCL1   | -0.66229 | -0.21104 | -2.48443 | 0.631877 |
| C7      | -0.74808 | 4.273564 | -2.47837 | 0.595396 |
| WISP2   | -0.66293 | 0.626469 | -2.45941 | 0.631595 |
| ATP2B2  | -0.62833 | -0.87281 | -2.45918 | 0.646925 |
| CXCL13  | -1.07633 | 0.502745 | -2.45522 | 0.474235 |
| ECEL1   | -0.64199 | 1.897521 | -2.43604 | 0.640829 |
| CD1C    | -0.68726 | 1.813457 | -2.43158 | 0.621033 |
| ZBTB16  | -0.70163 | 1.28588  | -2.42452 | 0.614877 |
| FAM135B | -0.77482 | 1.129467 | -2.42224 | 0.58446  |
| FAM163A | -0.64515 | 1.539612 | -2.41067 | 0.639428 |
| CDKN2A  | -0.81619 | -0.19708 | -2.3983  | 0.567939 |
| SLITRK1 | -0.63389 | 0.794453 | -2.38457 | 0.644437 |
| MLXIPL  | -0.64035 | 2.262297 | -2.36857 | 0.641557 |
| LY6K    | -0.87127 | -1.0687  | -2.36586 | 0.546665 |
| RALYL   | -0.71704 | 2.300006 | -2.3407  | 0.608345 |
| SLC4A10 | -0.77348 | 2.129407 | -2.33691 | 0.585006 |
| ERO1LB  | -0.63506 | 1.144287 | -2.33608 | 0.643916 |
| UCN3    | -0.86495 | 4.31011  | -2.33526 | 0.549064 |
| ELAVL4  | -0.66863 | 1.549603 | -2.33493 | 0.629105 |
| MAFA    | -0.6714  | 1.618309 | -2.32891 | 0.627899 |
| ARC     | -0.63725 | -0.50852 | -2.32871 | 0.642937 |
| LILRA4  | -0.63976 | 0.316548 | -2.32447 | 0.641819 |
| PRPH    | -0.76049 | 2.195416 | -2.316   | 0.590294 |
| CFC1B   | -1.18122 | 5.859296 | -2.30789 | 0.440978 |
| KIF5A   | -0.62553 | 1.391429 | -2.28927 | 0.648181 |
| LPPR1   | -0.62974 | -0.38031 | -2.28291 | 0.646295 |
| PRKCG   | -0.75154 | 2.480952 | -2.28139 | 0.593967 |
| RTBDN   | -0.7369  | 1.306767 | -2.27866 | 0.600028 |
| GHRL    | -0.75545 | 2.360762 | -2.26079 | 0.592361 |
| PCSK2   | -1.08665 | 4.612013 | -2.25834 | 0.470854 |
| SPOCK3  | -0.73036 | 0.661189 | -2.23498 | 0.602753 |
| KCNK16  | -1.05173 | 5.388461 | -2.23332 | 0.482388 |
| NEUROD1 | -0.94591 | 5.232371 | -2.22268 | 0.519103 |
| JSRP1   | -0.64714 | 1.658097 | -2.21957 | 0.638543 |
| DAPL1   | -0.62589 | 0.175564 | -2.21364 | 0.64802  |
| CR2     | -1.27628 | 2.142257 | -2.20739 | 0.41286  |
| BIRC7   | -0.69164 | 1.784894 | -2.20526 | 0.619149 |
| SST     | -1.01146 | 7.501049 | -2.19573 | 0.496044 |
| ATRNL1  | -0.64706 | 0.162978 | -2.1896  | 0.638582 |
| PAX5    | -0.77393 | 0.735405 | -2.18246 | 0.584821 |

|          |          |          |          |          |
|----------|----------|----------|----------|----------|
| GPR119   | -0.7129  | 2.43677  | -2.1754  | 0.610091 |
| CHIT1    | -0.87302 | 1.401594 | -2.1696  | 0.546003 |
| SYNGR4   | -0.64541 | 1.547629 | -2.15676 | 0.639311 |
| GPR98    | -0.67618 | -1.2883  | -2.15621 | 0.62582  |
| C13orf36 | -0.67288 | 1.19131  | -2.15546 | 0.627254 |
| PTPRT    | -0.62505 | 0.602247 | -2.14414 | 0.648398 |
| CHRDL1   | -0.73573 | 1.483152 | -2.12877 | 0.600516 |
| PTX3     | -0.6497  | 1.207115 | -2.08262 | 0.637415 |
| HS6ST3   | -0.67689 | 0.753618 | -2.0812  | 0.625513 |
| CCL21    | -0.75335 | 2.613068 | -2.07    | 0.593226 |
| CLCA2    | -0.65922 | -1.55667 | -1.99446 | 0.63322  |
| IGF1     | -0.6625  | 0.741902 | -1.98512 | 0.631781 |
| CCL17    | -0.68536 | 2.244204 | -1.97826 | 0.62185  |
| ANGPTL7  | -0.75561 | 1.975744 | -1.97813 | 0.592295 |
| HP       | -0.65415 | 0.84541  | -1.96303 | 0.635451 |
| MADCAM1  | -0.65363 | 3.25194  | -1.95367 | 0.635677 |
| HBA1     | -0.94451 | -1.17786 | -1.93902 | 0.519606 |
| FSTL5    | -0.63093 | 1.505637 | -1.93741 | 0.645761 |
| CD79A    | -0.7146  | 1.272561 | -1.93567 | 0.609373 |
| XPNPEP2  | -0.6368  | 0.111048 | -1.93459 | 0.643136 |
| SAA1     | -0.62978 | 2.361972 | -1.8966  | 0.646276 |
| KIF1A    | -0.70226 | 2.646808 | -1.89482 | 0.614609 |
| DDC      | -0.66973 | 3.053047 | -1.89184 | 0.628625 |
| RPS28    | -0.79814 | 0.291033 | -1.89054 | 0.575091 |
| GAD2     | -0.80037 | 4.443524 | -1.87475 | 0.574204 |
| CRH      | -0.71097 | 2.141334 | -1.8476  | 0.61091  |
| G6PC2    | -0.94707 | 5.675587 | -1.83817 | 0.518685 |
| SCGN     | -0.83783 | 5.332842 | -1.82322 | 0.559486 |
| CDH22    | -0.67731 | 2.596132 | -1.80827 | 0.625332 |
| NPHS1    | -0.6697  | 2.749053 | -1.80267 | 0.628637 |
| CYP2C9   | -0.63473 | 3.982243 | -1.7717  | 0.644063 |
| DLK1     | -0.85395 | 4.07284  | -1.76121 | 0.553267 |
| IAPP     | -0.95265 | 5.477357 | -1.71189 | 0.516681 |
| HEPACAM2 | -0.64299 | 3.81685  | -1.64168 | 0.640385 |
| TSIX     | -0.8441  | -0.19474 | -1.46824 | 0.557058 |
| TTR      | -0.83465 | 8.892266 | -1.37051 | 0.56072  |
| XIST     | -0.71933 | -0.37398 | -0.85427 | 0.607378 |

---

**Table S4.** Association between 5-lncRNA signature-based classification and clinic-pathologic characteristics in PDAC patients involved in the study.

| <b>Features</b>                | <b>Low-risk group</b> | <b>High-risk group</b> | <b>P value</b>   |
|--------------------------------|-----------------------|------------------------|------------------|
| Entire TCGA cohort (N=177)     | N=89                  | N=88                   |                  |
| Age at diagnosis, years        |                       |                        |                  |
| ≤60                            | 29(32.58%)            | 25(28.41%)             | 0.546            |
| >60                            | 60(67.42%)            | 63(71.59%)             |                  |
| Gender                         |                       |                        |                  |
| Female                         | 40(44.94%)            | 40(45.45%)             | 0.944            |
| Male                           | 49(55.06%)            | 48(54.55%)             |                  |
| MSI status                     |                       |                        |                  |
| MSI-I                          | 17(19.10%)            | 11(12.5%)              | 0.131            |
| MSI-L                          | 2(2.25%)              | 7(7.95%)               |                  |
| MSS                            | 70(78.65%)            | 70(79.55%)             |                  |
| Histologic grade               |                       |                        |                  |
| G1                             | 17(19.32%)            | 13(14.94%)             | 0.547            |
| G2                             | 50(56.82%)            | 45(51.72%)             |                  |
| G3                             | 20(22.73%)            | 28(32.18%)             |                  |
| G4                             | 1(1.14%)              | 1(1.15%)               |                  |
| TNM stage                      |                       |                        |                  |
| I                              | 17(19.54%)            | 4(4.55%)               | <b>0.024</b>     |
| II                             | 66(75.86%)            | 79(89.77%)             |                  |
| III                            | 2(2.30%)              | 2(2.27%)               |                  |
| IV                             | 2(2.30%)              | 3(3.41%)               |                  |
| OS status                      |                       |                        |                  |
| Alive                          | 59(66.29%)            | 26(29.55%)             | <b>&lt;0.001</b> |
| Dead                           | 30(33.71%)            | 62(70.45%)             |                  |
| Fudan Validation cohort (N=46) | N=23                  | N=23                   |                  |
| Age at diagnosis, years        |                       |                        |                  |
| ≤60                            | 12(52.17%)            | 11(47.83%)             | 0.768            |
| >60                            | 11(47.83%)            | 12(52.17%)             |                  |
| Gender                         |                       |                        |                  |
| Female                         | 10(43.48%)            | 11(47.83%)             | 0.767            |
| Male                           | 13(56.52%)            | 12(52.17%)             |                  |
| TNM stage                      |                       |                        |                  |
| I                              | 6(27.27%)             | 4(19.05%)              | 0.450            |
| II                             | 12(54.55%)            | 9(42.86%)              |                  |
| III                            | 4(18.18%)             | 7(33.33%)              |                  |
| IV                             | —                     | 1(4.76%)               |                  |
| OS status                      |                       |                        |                  |
| Alive                          | 16(69.57%)            | 7(30.43%)              | <b>0.008</b>     |
| Dead                           | 7(30.43%)             | 16(69.57%)             |                  |

Microsatellite instability (MSI); Microsatellite stable (MSS); MSI-indeterminate (MSI-I); MSI-low

(MSI-L); TNM, Tumor node metastasis
